1 **A cell atlas of human adrenal cortex development and disease**

2

3 Ignacio del Valle<sup>1</sup>, Matthew D Young<sup>2</sup>, Gerda Kildisiute<sup>2</sup>, Olumide K Ogunbiyi<sup>3,4</sup>, Federica  
4 Buonocore<sup>1</sup>, Ian C Simcock<sup>5,6</sup>, Eleonora Khabirova<sup>2</sup>, Berta Crespo<sup>4</sup>, Nadjeda Moreno<sup>4</sup>, Tony  
5 Brooks<sup>7</sup>, Paola Niola<sup>7</sup>, Katherine Swarbrick<sup>3,4</sup>, Jenifer P Suntharalingham<sup>1</sup>, Sinead M  
6 McGlacken-Byrne<sup>1</sup>, Owen J Arthurs<sup>5</sup>, Sam Behjati<sup>2,8,9†</sup>, John C Achermann<sup>1+\*</sup>

7

8 <sup>1</sup>Genetics and Genomic Medicine Research and Teaching Department, UCL Great Ormond  
9 Street Institute of Child Health, University College London, London, WC1N 1EH, UK;

10 <sup>2</sup>Wellcome Sanger Institute, Wellcome Genome Campus, Hinxton, Cambridge, CB10 1SA,  
11 UK; <sup>3</sup>Department of Histopathology, Great Ormond Street Hospital for Children NHS

12 Foundation Trust, London, WC1N 3JH, UK; <sup>4</sup>Developmental Biology and Cancer Research and  
13 Teaching Department, UCL Great Ormond Street Institute of Child Health, University College  
14 London, London, WC1N 1EH, UK; <sup>5</sup>Department of Clinical Radiology, Great Ormond Street

15 Hospital for Children NHS Foundation Trust, London, WC1N 3JH, UK; <sup>6</sup>Population, Policy and  
16 Practice Research and Teaching Department, UCL Great Ormond Street Institute of Child  
17 Health, University College London, London, WC1N 1EH, UK; <sup>7</sup>UCL Genomics, Zayed Centre

18 for Research, UCL Great Ormond Street Institute of Child Health, University College London,  
19 London, WC1N 1DZ, United Kingdom; <sup>8</sup>Cambridge University Hospitals NHS Foundation  
20 Trust, Cambridge, CB2 0QQ, UK; <sup>9</sup>Department of Paediatrics, University of Cambridge,

21 Cambridge, CB2 0QQ, UK.

22

23 †Jointly supervised the work

24 \*Corresponding author

25

26 **Short title:** Human fetal adrenal gland development

27

28 **Keywords:** Adrenal gland, transcriptomics, scRNA-seq, steroidogenesis, HOPX, RSPO3,  
29 imprinted genes, adrenal insufficiency

30

31 **Correspondence:**

32 John C. Achermann, MB MD PhD, Genetics & Genomic Medicine Research and

1 Teaching Department, UCL Great Ormond Street Institute of Child Health, University

2 College London, London, WC1N 1EH, UK. E-mail: [j.achermann@ucl.ac.uk](mailto:j.achermann@ucl.ac.uk)

3 ORCID: 0000-0001-8787-6272

4

5 **Word count: 5373**

6

7

1 **Abstract**

2

3 The adrenal glands synthesize and release essential steroid hormones such as cortisol and  
4 aldosterone, but the mechanisms underlying human adrenal gland development are not  
5 fully understood. Here, we combined single-cell and bulk RNA-sequencing, spatial  
6 transcriptomics, immunohistochemistry and micro-focus computed tomography to  
7 investigate key aspects of adrenal development in the first 20 weeks of gestation. We  
8 demonstrate rapid adrenal growth and vascularization, with cell division in the outer  
9 definitive zone (DZ). Steroidogenic pathways favor androgen synthesis in the central fetal  
10 zone (FZ), but DZ capacity to synthesize cortisol and aldosterone develops with time. Core  
11 transcriptional regulators were identified, with a role for HOPX in the DZ. Potential ligand-  
12 receptor interactions between mesenchyme and adrenal cortex were seen (e.g.,  
13 *RSPO3/LGR4*). Growth-promoting imprinted genes were enriched in the developing cortex  
14 (e.g. *IGF2*, *PEG3*). These findings reveal new aspects of human adrenal development, and  
15 have clinical implications for understanding primary adrenal insufficiency and related  
16 postnatal adrenal disorders, such as adrenal tumor development, steroid disorders and  
17 neonatal stress.

18

19

## 1 Introduction

2

3 The mature, adult adrenal glands are essential endocrine organs that consist of an outer  
4 cortex and a central medulla. The adrenal cortex has three layers that synthesize and  
5 release key groups of steroid hormones<sup>1-4</sup>. Mineralocorticoids (e.g., aldosterone) are  
6 released from the outer zona glomerulosa and are needed for salt retention and blood  
7 pressure maintenance. Glucocorticoids (e.g. cortisol) are released predominantly from the  
8 zona fasciculata and are needed for wellbeing and glucose regulation. Weak androgens  
9 (e.g., dehydroepiandrosterone) are released from the inner zona reticularis and influence  
10 adrenarche in mid-childhood, with potential effects on health in adult women<sup>5-7</sup>. In  
11 contrast, the central adrenal medulla is neuroectodermal in origin and releases epinephrine  
12 (adrenaline) and norepinephrine (noradrenaline)<sup>8</sup>. Thus, the adrenal glands play an essential  
13 role in the acute stress response, many aspects of physiological homeostasis, and long-term  
14 wellbeing.

15

16 Disruption of adrenal gland function (known as primary adrenal insufficiency, PAI) leads to  
17 glucocorticoid insufficiency, often combined with mineralocorticoid insufficiency<sup>9-11</sup>. PAI can  
18 present at various ages with symptoms such as malaise, weight loss, hyperpigmentation and  
19 hypotension, and can be fatal if not diagnosed and treated appropriately<sup>9</sup>. Although  
20 autoimmune destruction of the adrenal gland (sometimes referred to as “Addison disease”)  
21 is the most common cause of PAI in adolescents and adults, around 30 different single gene  
22 disorders have now been identified that result in PAI through diverse processes such as  
23 impaired development (hypoplasia), blocks in steroid biosynthesis (congenital adrenal  
24 hyperplasia, CAH), adrenocorticotropic hormone (ACTH) resistance (“familial glucocorticoid  
25 deficiency”, FGD), and metabolic conditions<sup>10,12,13</sup>. PAI often presents soon after birth, or  
26 more gradually in childhood or even adulthood. Individuals with PAI require lifelong adrenal  
27 steroid hormone replacement, with management sometimes modified based on the  
28 underlying cause<sup>9,14</sup>.

29

30 In humans, the adrenal cortex develops from bilateral condensations of intermediate  
31 mesoderm, known as the “adrenogonadal primordium”, at approximately 4 weeks post  
32 conception (wpc) (6 weeks gestation)<sup>15-18</sup>. These structures are in close proximity to the

1 developing kidneys, and give rise to both the adrenal gland and gonad (testis, ovary)<sup>15,19</sup>.  
2 The adrenal cortex and gonad share several distinct functional pathways, such as the ability  
3 to synthesize steroid hormones and regulation by the nuclear receptor, NR5A1 (also known  
4 as steroidogenic factor-1, SF-1)<sup>20-23</sup>. In contrast, the adrenal medulla is ectodermal in origin  
5 and arises from Schwann cell precursor cells that migrate into the adrenal gland and  
6 differentiate into sympathoblastic and chromaffin cells<sup>8,24</sup>. These cells ultimately coalesce  
7 centrally to form the adrenal medulla.

8  
9 Although insights into adrenal development and function are being obtained from studies in  
10 model systems (e.g., mice, zebrafish)<sup>25-29</sup>, the adrenal cortex in humans and higher primates  
11 has distinct structural and functional components<sup>30</sup>. Most notable is the development of a  
12 large fetal zone (FZ), which is capable of synthesizing and releasing substantial amounts of  
13 the weak androgen, dehydroepiandrosterone (DHEA) and its sulfated form, DHEA-S. DHEA is  
14 converted to estrogens by the placenta, which enter the maternal circulation during  
15 pregnancy<sup>16</sup>. The FZ regresses in the first few months of postnatal life<sup>30,31</sup>. The teleological  
16 function of the FZ is not known although DHEA may have a role in neurodevelopment<sup>32</sup>.  
17 Mice have an X-zone that regresses with sexual maturity (males) or pregnancy (females), but  
18 similarities with the human FZ are somewhat limited<sup>33-35</sup>. Furthermore, cortisol is the  
19 primary glucocorticoid synthesized by the adrenal gland in humans whereas rodents  
20 generate higher concentrations of corticosterone<sup>3</sup>.

21  
22 In recent years, a limited number of studies of human adrenal development or fetal adrenal  
23 steroidogenesis have been undertaken using gene expression approaches or focussed RT-  
24 PCR/immunohistochemistry (IHC) of steroid pathways<sup>18,20,36-40</sup>. However, few data currently  
25 exist for detailed transcriptomic analysis of the human adrenal cortex at a single cell level  
26 during the critical first half of gestation (to 20wpc) or transcriptomics linked to  
27 developmental anatomy. We therefore developed a multimodal approach to investigate  
28 human adrenal cortex development in detail.

29  
30

## 1 Results

2

### 3 ***The developing adrenal gland has a defined transcriptomic profile***

4

5 In order to study the key biological events involved in human adrenal development, we  
6 integrated single-cell RNA-sequencing (scRNA-seq), bulk RNA-seq, spatial transcriptomics,  
7 immunohistochemistry (IHC) and micro-focus computed tomography (micro-CT) imaging  
8 across a critical developmental time-frame between 6 to 20wpc (Fig. 1a, Supplementary  
9 Data 1).

10

11 During this period, the adrenal gland undergoes rapid growth, and specific morphological  
12 changes such as the development of a deep sulcus and marked increases in vascularization  
13 (Fig. 1b-d, Supplementary Fig. 1, Supplementary Movie 1).

14

15 At a global level (bulk RNA-seq), the developing adrenal gland showed a well-defined  
16 transcriptomic profile compared to control tissues. This transcriptome is more similar to  
17 kidney at early stages of development (7wpc) but becomes increasingly distinct with age  
18 (Fig. 1e, Supplementary Fig. 2). A subset of highly differentially expressed adrenal-specific  
19 genes was identified, including known genes (e.g. *MC2R*, *STAR*, *CYP11A1*) as well as several  
20 genes not previously identified as differentially-expressed in adrenal development  
21 (e.g. *CLRN1*, *MIR202HG*, *FAM166B*) (Fig. 1f, Supplementary Fig. 2, Supplementary Data 2).

22

23 In order to define specific cell populations within the adrenal gland in more detail, single cell  
24 mRNA transcriptome analysis (scRNA-seq) was undertaken at four timepoints (6wpc,  
25 6wpc+6days (d), 8wpc+5d, 19wpc) (Fig. 1a, g)<sup>24</sup>. This analysis clearly identified a cluster of  
26 adrenal cortex cells, with strong enrichment for genes involved in steroidogenesis (Fig. 1g,  
27 Fig. 2a, Supplementary Data 3). Other major clusters included cells that contribute to the  
28 developing adrenal medulla (Schwann cell precursors, sympathoblastic cells, chromaffin  
29 cells and recently described “medullary bridge” cells)<sup>24</sup>, as well as mesenchymal cells,  
30 vascular endothelial cells, erythroblasts and leukocytes (Fig. 1g, Supplementary Fig. 3). The  
31 relative proportion of mesenchymal cells decreased over time with differentiation, whereas  
32 the vascular endothelial components and erythroblast cells increased, consistent with the

1 development of an extensive vascular network supplying the adrenal gland and a network of  
2 sinusoids within it, necessary for the release of steroid hormones into the developing fetal  
3 circulation (Fig. 1h-j, Supplementary Fig. 3).

4

#### 5 ***The adrenal cortex has distinct zones***

6

7 Subsequent analysis focussed on the fetal adrenal cortex (Fig. 1g, Fig. 2a, Supplementary  
8 Fig. 4), as relatively few data are available for cortex development in humans, especially in  
9 the second trimester, and single cell mRNA transcriptome analysis allows new insights to be  
10 obtained.

11

12 Histologically, the fetal adrenal cortex is broadly divided into an outer definitive zone (DZ),  
13 somewhat similar to the postnatal zona glomerulosa and zona fasciculata, and an inner fetal  
14 zone (FZ) consisting of large cytomegalic cells interspersed with vascular sinusoids (Fig. 2b).  
15 A distinct capsule forms around the adrenal gland during the first trimester, with a putative  
16 transition zone developing later in the second trimester<sup>30</sup>.

17

18 In order to study cortex zonation in more detail, we used nephroblastoma  
19 overexpressed/cysteine-rich protein 61/connective tissue growth factor/nephroblastoma  
20 overexpressed gene-3 (*NOV*, also known as *CCN3*) as a marker for the DZ, and  
21 sulfotransferase 2A1 (*SULT2A1*) as a marker for the FZ<sup>39,41,42</sup>. These genes differentiated the  
22 DZ and FZ clearly in an integrated scRNA-seq dataset, as well as by spatial transcriptomics  
23 (7wpc+4d) and IHC (11 wpc data shown) (Fig. 2c-h). Of note, cycling cells (S phase, GM2  
24 phase) clustered more closely with the DZ rather than the FZ in all stages studied (Fig. 2i,  
25 Supplementary Fig. 5a-c). This finding was supported by IHC using KI-67 as a marker of cell  
26 division (Fig. 2j). The relative proportion of dividing cells was highest during early  
27 development (Fig. 2j, k), consistent with rapid growth of the gland during this time (Fig. 1c,  
28 Supplementary Fig. 1). During the earliest stage (6w), a trajectory of cells from the DZ to FZ  
29 was seen (Supplementary Fig. 5d). Taken together, these data suggest that the DZ is a more  
30 active region of cell division compared to the FZ, and with potential centripetal cell  
31 differentiation at least in early development<sup>43-46</sup>.

32

## 1 ***Fetal adrenal steroidogenesis favors DHEA synthesis***

2

3 A major role of the mature, postnatal adrenal cortex is to synthesize and release steroid  
4 hormones such as cortisol and aldosterone. The extent to which the developing adrenal  
5 gland has the biosynthetic capacity to produce these steroids is still unclear. It is well  
6 established that the FZ synthesizes and releases large amounts of DHEA(S), due to a relative  
7 lack of the enzyme 3  $\beta$ -hydroxysteroid dehydrogenase type 2 (3 $\beta$ -HSD2, encoded by  
8 *HSD3B2*) and likely high expression of genes encoding enzymes needed for androgen  
9 biosynthesis (i.e. *CYP17A1*, *POR*, *CYB5A*). Although a transient wave of *HSD3B2*/3 $\beta$ -HSD2  
10 expression has been shown at around 8-9 wpc<sup>37,39</sup>, evidence is still emerging as to when the  
11 necessary enzymes for glucocorticoid (e.g., cortisol) and mineralocorticoid (e.g.,  
12 aldosterone) synthesis are expressed during human adrenal development, especially into  
13 the second trimester<sup>38,39</sup>.

14

15 In order to explore this further, we analyzed time-series bulk RNA-seq data (between 7wpc  
16 and 11.5wpc), which showed a clear temporal increase in expression of the ACTH receptor  
17 (*MC2R*), as well as steroidogenic acute regulator protein (*STAR*) and most other  
18 steroidogenic enzymes (Fig. 3a, b, Supplementary Fig. 6). These data show that the  
19 machinery for ACTH-dependent cholesterol processing is in place during early development,  
20 and increases with age.

21

22 Next, a scRNA-seq dataset was generated sub-setting the annotated adrenal cortex cells at  
23 each time point studied, with cycling cells removed (see Uniform Manifold Approximation  
24 and Projection (UMAP), Fig. 3c). Across all stages, cells of the FZ region showed high  
25 expression of genes encoding the key enzymes needed for DHEA synthesis (*STAR*, *CYP11A1*,  
26 *CYP17A1*, *POR*, *CYB5A*) as well as of *SULT2A1* (encoding sulfotransferase 2A1), which is  
27 required for sulfation of DHEA to DHEA-S and protects the developing fetus from androgen  
28 exposure (Fig. 3d). As expected, *HSD3B2* expression was low in the FZ during development,  
29 resulting in the likely shuttling of steroid precursors (e.g. pregnenolone) into the androgen  
30 pathway. The high expression of *STAR* and *CYP11A1* in the FZ cluster was mirrored by high  
31 expression of the ACTH receptor and its accessory protein (*MRAP*) suggesting not only that  
32 the FZ has the capacity to be highly biosynthetically active but also that FZ DHEA synthesis



1 may be ACTH-dependent. Of note, enzymes proposed to be involved in the “backdoor”  
2 pathway of androgen synthesis<sup>40</sup> were not strongly expressed, although several components  
3 of the pathway needed for 11-oxygenation of androgens<sup>47</sup> were (Supplementary Figs. 7-9).

4  
5 As 3 $\beta$ -hydroxysteroid dehydrogenase type 2/*HSD3B2* is effectively a “gatekeeper” to  
6 glucocorticoid and mineralocorticoid biosynthesis (Fig. 3d), we investigated *HSD3B2*  
7 expression across time-series data. Although a potential transiently higher expression was  
8 seen at 8wpc in bulk RNA-seq data (Supplementary Fig. 6), as reported previously<sup>37,39</sup>,  
9 single-cell transcriptomic data showed overall greater increase in *HSD3B2* across time, with  
10 the highest levels in the DZ cluster at 19wpc (Fig. 3e). A similar graded increase in *CYP21A2*  
11 (encoding 21-hydroxylase) and *CYP11B1* (encoding 11 $\beta$ -hydroxylase type 1) was seen (Fig.  
12 3e). Single-cell gene co-expression analysis revealed a distinct subset of cells that  
13 proportionately co-expressed *HSD3B2* and *CYP21A2* in early developmental stages, although  
14 by 19wpc it appeared that *CYP21A2* expression occurred in a greater number of cells, and  
15 that expression of *HSD3B2* (and its protein) was the likely rate-limiting factor (Fig. 3f).  
16 Expression of *CYP21A2* and *CYP11B1* was linked (Supplementary Fig. 10). Taken together,  
17 these data suggest that there is an increase in gene expression of the enzymatic machinery  
18 needed for glucocorticoid synthesis across time.

19  
20 It is also debated at what stage the developing fetal adrenal gland can synthesize  
21 mineralocorticoids, such as aldosterone<sup>38,39</sup>. Here, *CYP11B2* (encoding 11 $\beta$ -hydroxylase type  
22 2/aldosterone synthase) is a key enzyme in the final stages of aldosterone synthesis, as well  
23 as *HSD3B2*, which is needed to allow precursors into this pathway (Fig. 3d). In our scRNA-  
24 seq data, *CYP11B2* expression was low in early stages but increased by 19wpc in a sub-  
25 population of cells in the DZ (Fig. 3d, e). Again, single-cell co-expression analysis suggested  
26 that *HSD3B2* and *CYP11B2* are often linked (Fig. 3g) and their encoded enzymes are likely to  
27 be rate-limiting factors compared to those encoded by *CYP21A2* and *CYP11B1*.

### 28 29 ***Transcriptional regulation of the fetal adrenal cortex***

30  
31 In order to study “core” transcriptional regulators of human adrenal cortex, we first  
32 identified genes that were differentially-expressed in the cortex cluster compared to non-

1 cortex clusters at each scRNA-seq stage ( $\log_2FC > 0.25$ ,  $p_{adj} < 0.05$ ), and compared these  
2 genes to the Animal Transcription Factor Database (TFDB)<sup>48</sup> (Supplementary Data 4). At each  
3 developmental time point studied, transcription factors represented between 1.8-2.4% of all  
4 differentially expressed cortex genes (Supplementary Fig. 11a). By intersecting these  
5 analyses, 17 “core” transcriptional regulators were identified that were common to all  
6 datasets (Fig. 4a-c, Supplementary Fig. 11, Supplementary Fig. 12). These factors were all  
7 present in bulk RNA-seq analysis of adrenal gland samples compared to control tissues  
8 ( $\log_2FC > 1.5$ ,  $p_{adj} < 0.05$ ), suggesting that they had a strong degree of adrenal specificity  
9 (Supplementary Fig. 11b, c; Supplementary Data 4).

10

11 Two key transcription factors that are well-established regulators of adrenal development  
12 are the orphan nuclear receptors, NROB1 (DAX-1) and NR5A1 (SF-1)<sup>15,20,22,23</sup>. Disruption of  
13 NROB1 causes X-linked adrenal hypoplasia, which is one of the most common causes of PAI  
14 in children (boys)<sup>13,49</sup>. NR5A1 is a master-regulator of adrenal and reproductive  
15 development and function, and more severe disruption is also associated with PAI in  
16 humans<sup>23,50</sup>. Many studies have suggested that NROB1 and NR5A1 can be functional  
17 partners, but data about expression in human development are still limited<sup>15,20,33,51</sup>. Cluster  
18 analysis in scRNA-seq datasets as well as spatial transcriptomic analysis showed that  
19 expression of *NROB1* and *NR5A1* occurs extensively throughout the fetal adrenal gland and  
20 that co-expression occurs in a subset of cells (Fig. 4c-e, Supplementary Fig. 11c). Taken  
21 together, these data support the key role that NROB1 and NR5A1 play in transcription  
22 regulation and specification of human adrenal development.

23

#### 24 ***HOPX is a novel definitive zone factor***

25

26 Although most of the “core” transcription factors identified showed expression throughout  
27 the adrenal cortex (i.e., DZ and FZ), one adrenal-enriched gene that was expressed very  
28 strongly in the DZ compared to the FZ was *HOPX* (Fig. 5a, b). *HOPX* is an atypical  
29 homeodomain protein (also known as Hop homeobox/“homeobox-only protein”) that lacks  
30 direct DNA-binding capacity but interacts with transcriptional regulators to maintain  
31 quiescence in specific embryonic and adult stem cell populations, and to control cell

1 proliferation during organogenesis<sup>52,53</sup>. HOPX also acts as a tumor suppressor, and reduced  
2 HOPX expression is associated with several cancers<sup>52,53</sup>.

3

4 In our scRNA-seq dataset, HOPX was consistently one of the most differentially-expressed  
5 markers of the DZ compared to the FZ in all ages studied (Supplementary Fig. 13;  
6 Supplementary Data 3). This highly-specific enrichment of *HOPX* in the DZ was confirmed by  
7 spatial transcriptomic analysis, which showed a strong “ring” of *HOPX* DZ expression at  
8 7wpc+4d, with a peripheral ring of weaker expression likely representing mesenchymal cells  
9 (Fig. 5c). This finding was validated by immunohistochemistry, which showed that HOPX  
10 defined the outer border of the DZ at the interface of the peripheral mesenchyme at late  
11 6wpc (Fig. 5d). Furthermore, serial IHC analyses showed that HOPX was expressed in the  
12 outer DZ across time (late 6wpc-20wpc), marking the boundary between the developing  
13 adrenal gland and the mesenchyme (early) or subcapsular region of cells (later) (Fig. 5e,  
14 Supplementary Fig. 14).

15

16 As expected given its role in the DZ, *HOPX* co-localized in clusters with the DZ marker *NOV* in  
17 scRNA-seq analysis, especially during early stages of development (Fig. 5f). However, by  
18 19wpc, *HOPX* expression was relatively reduced (Fig. 4b, Fig. 5f) and localized within a zona  
19 glomerulosa-like cluster that also expressed *HSD3B2*, *CYP11B2*, and the orphan nuclear  
20 receptors *NR4A1* (*NURR77*)/*NR4A2* (*NUR1*) (Fig. 5g, h, Supplementary Fig. 13,  
21 Supplementary Fig. 15). Of note, an emergent population of *NOV* positive/*HOPX* negative  
22 cells was identified by scRNA seq at 19wpc, which was located just central to the peripheral  
23 *HOPX* positive cells on dual-labeled IHC (Fig. 5f, Supplementary Fig. 15e). Furthermore,  
24 *HOPX* does not seem to be expressed in the mature adult human adrenal gland, consistent  
25 with the decreased expression of this gene seen with time  
26 (<https://www.proteinatlas.org/ENSG00000171476-HOPX/tissue>). Thus, *HOPX* likely plays a  
27 role in defining the human fetal adrenal DZ and emerging zona glomerulosa in early  
28 development, and may maintain a specific population of cells in a replication state.

29

30 ***Mesenchyme-cortex interactions during development***

31

1 As the adrenal gland forms within a region of mesoderm/mesenchyme (Fig. 5c-e), more  
2 detailed analyses of potential ligand-receptor signaling interactions were undertaken using a  
3 combined adrenal cortex-mesenchyme scRNA-seq data. Notably, a potential transcriptomic  
4 “bridge” between the mesenchyme and cortex was identified in the merged adrenal  
5 dataset, particularly in the 6wpc+5d sample (Fig. 1g, Fig. 6a). A trajectory of cells undergoing  
6 differentiation from the mesenchyme to cortex was also observed (Fig. 6b).

7

8 Using CellPhoneDB (CellPhoneDB v2.0)<sup>54</sup> to investigate cell-cell communication networks  
9 and ligand-receptor interactions at this stage of adrenal gland development, several key  
10 systems were found to be enriched (Fig. 6c-g). For example, insulin-like growth-factor 2  
11 (*IGF2*) showed strong expression in mesenchyme and adrenal cortex, with strongest  
12 expression in the fetal zone, the region of highest expression of its cognate receptors, *IGF1R*  
13 and *IGF2R* (Fig. 6c, d, Supplementary Fig. 16, Supplementary Fig. 17). In contrast, *DLK1* (also  
14 known as PREF1) showed high adrenal cortex expression whereas the linked Notch family of  
15 receptors are expressed predominantly in the mesenchymal component (Fig. 6c, e, h,  
16 Supplementary Fig. 16).

17

18 Two key signaling systems where ligands are potentially secreted from mesenchymal cells  
19 and have receptors in the developing adrenal cortex are *CXCL12* (encoding the  
20 ligand)/*CXCR4* (encoding the receptor), and *RSPO3* (ligand)/*LGR4* (receptor) (Fig. 6 c, f, g, i, j,  
21 Supplementary Fig. 16). *RSPO3/LGR4* are part of the WNT signaling system and  
22 *Rspo3/Rspondin3* has been proposed previously to be a key ligand released by subcapsular  
23 cells in both mouse and human adrenal development, with potential interactions with *Lgr5*  
24 and *Znrf3*<sup>18,55,56</sup>. Using spatial transcriptomics, *RSPO3* expression was found to be expressed  
25 in the mesenchyme, including in an outer layer around the early adrenal gland (7wpc+4d),  
26 whereas *LGR4* was expressed more centrally in the fetal zone region (Fig. 7g, j). Strong *LGR5*  
27 and *LGR6* expression or interactions were not seen (Supplementary Fig. 16). Thus, although  
28 several signalling systems have been proposed in adrenal development from data in the  
29 mouse<sup>25,27,57</sup>, our unsupervised analysis of ligand-receptor interactions support the roles of  
30 *IGF2*, *DLK1* and *RSPO3/Rspondin3* as major components in human adrenal development,  
31 and suggest that *CXCL12* may also influence potential mesenchyme-adrenal interactions.

32

## 1 ***Imprinted genes are enriched in the human fetal adrenal gland***

2

3 *IGF2* and *DLK* are both imprinted genes, and it is well recognized that imprinted genes play a  
4 key role in many aspects of fetal and placental growth in humans<sup>58</sup>. Paternally-expressed  
5 (maternally-imprinted) genes are frequently linked to growth promotion, whereas  
6 maternally-expressed (paternally-imprinted) genes are associated with growth restriction.  
7 To address the potential role of imprinted genes in the developing fetal adrenal gland in  
8 more detail, differential expression was initially studied using bulk-RNAseq data (adrenal  
9 versus control,  $\log_2FC > 1.5$   $padj < 0.05$ ). We found that 15 out of 84 (17.9%) well-established,  
10 non-placental-specific human imprinted genes<sup>59</sup> were differentially expressed in the adrenal  
11 gland, representing a significant enrichment of imprinted genes (15/1354 versus 69/18325,  
12 Chi-sq 15.9,  $p < 0.0001$ ) (Fig. 7a, b; Supplementary Data 5). Expression of these genes in  
13 adrenal cortex clusters was confirmed by scRNA-seq analysis (Fig. 7c). Several key  
14 paternally-expressed genes were identified (e.g. *DLK1*, *PEG3*, *IGF2*, *PEG10*), often in the FZ  
15 (Fig. 7 e-i). Taken together, these data highlight the important growth-promoting role  
16 paternally-expressed genes such as *IGF2* and *PEG3* play in the human fetal adrenal cortex  
17 during early development, at a time of rapid adrenal gland growth (Fig. 1b, Supplementary  
18 Fig. 17).

19

## 20 ***Adult adrenal transcriptomic expression and primary adrenal insufficiency (PAI)***

21

22 Finally, we considered how the transcriptomic profile of adrenal gland development relates  
23 to the adult adrenal gland, as well as to genes known to cause PAI.

24

25 Using the top differentially-expressed genes in the adult adrenal gland (n=12) (Human  
26 Protein Atlas, <https://www.proteinatlas.org/humanproteome/tissue/adrenal+gland>), we  
27 found consistent correlations with many differentially-expressed genes during  
28 developmental (Fig. 8a), although *GML* (encoding glycosylphosphatidylinositol anchored  
29 molecule like) was not present in the fetal data and several other genes were predominantly  
30 expressed in later fetal adrenal stage (19wpc) (e.g. *HSD3B2*, *CYP11B2*, *ADGRV1*)  
31 (Supplementary Fig. 18). This finding contrasts with *HOPX*, which is predominantly  
32 expressed in the fetal adrenal but not in the adult organ.

1  
2 We also analyzed developmental expression of genes known to be monogenic causes of PAI  
3 (Fig. 8b)<sup>10</sup>. Most key transcription factors (e.g. *NR5A1*, *NROB1*), components of  
4 steroidogenesis (e.g. *STAR*, *CYP11A1*, *CYP21A2*) and genes involved in ACTH-signalling (e.g.,  
5 *MC2R*, *MRAP*) showed high specificity for expression in the fetal adrenal cortex cluster (Fig.  
6 8b). However, many genes linked to oxidative stress processes or metabolic function were  
7 more ubiquitously expressed (e.g., *NNT*, *AAAS*, *SGPL1*, *ABCD1*)<sup>60–63</sup> (Fig. 8b, c). In addition,  
8 out of those genes associated with multisystem growth restriction phenotypes (e.g. *MCM4*,  
9 *CDKN1C*, *SAMD9*, *POLE*)<sup>64–66</sup>, only *MCM4* (PAI, short stature, natural-killer cell deficiency)  
10 was expressed predominantly in cycling cells (S-phase) (Fig. 8b, d). Overall, these findings  
11 could have clinical relevance. For example, when the age of presentation of children with  
12 classic monogenic causes of PAI was analyzed, it emerged that children who had disruption  
13 of highly adrenal cortex/adrenal specific genes often presented with adrenal insufficiency  
14 soon after birth (in the first two weeks), whereas those children with defects in genes with  
15 less adrenal cortex specific profiles often have a delayed clinical presentation in later  
16 infancy, childhood or even adult life (Chi-sq 8.56, p<0.005) (Fig. 8e, Supplementary Data 6).  
17 These data suggest that, for some conditions, a period of postnatal stress and  
18 decompensation may be required before adrenal insufficiency presents, which could  
19 provide a window of opportunity for intervention if a diagnosis is made early enough.  
20

## 1 Discussion

2

3 This study provides one of the first detailed insights into the complexities of human adrenal  
4 gland development up to 20 wpc and demonstrates the benefits of integrating  
5 transcriptomic data (bulk RNA-seq, scRNA-seq, spatial) with developmental anatomy and  
6 physiology when investigating the biological basis of organogenesis and related clinical  
7 conditions.

8

9 It is already established that the human adrenal gland undergoes marked growth  
10 throughout gestation, and at birth is approximately the same weight as in adult life<sup>37,38</sup>.

11 Much of this growth is due to the expansion of the large FZ, which is only found in humans  
12 and higher primates. Here, we document changes in growth and morphology up to 20 wpc.

13 Using scRNA-seq analysis of cycling cells, coupled with IHC markers of cell division (KI-67),  
14 we show that there is rapid cell division during the late embryonic/early fetal stage, and that  
15 the majority of dividing cells are located in the outer DZ region. A potential trajectory of cell  
16 differentiation from the DZ to FZ was seen during early adrenal development<sup>25,27,43-46</sup>.

17 Imprinted genes, such as *IGF2* and *DLK1*, play a key role in adrenal growth<sup>36,58,67-70</sup>. Here, we  
18 demonstrate strong expression of paternally-expressed growth-promoting genes, especially  
19 in the FZ region, consistent with the rapid growth seen during this stage of development.

20

21 Another key finding was the marked increase in vascularization of the adrenal gland across  
22 this time frame, and development of vascular sinusoids within the FZ. Novel imaging  
23 techniques such as microCT<sup>71</sup> highlighted the surface arrangement of these vascular  
24 networks, especially on the inferior aspect of the adrenal gland that is adjacent on the upper  
25 pole of the kidney. Studies of angiogenesis and vascular remodeling in the fetal adrenal  
26 gland have focussed on both the VEGF/VEGFR1 and angiopoietin/Tie systems<sup>72-75</sup>. Vascular  
27 channels are crucial for transporting large amounts of adrenal androgens into the fetal  
28 circulation, with subsequent placental conversion to estrogens. The vascular anatomy also  
29 influences the dynamic interplay between the adrenal cortex and medulla, and children with  
30 steroidogenic defects in the cortex such as CAH have reduced medullary reserve<sup>76-78</sup>. The  
31 late embryonic and fetal period is a key time when these vascular systems are established.

32

1 Although the main role of the adult adrenal cortex is the biosynthesis and release of steroid  
2 hormones (mineralocorticoids, glucocorticoids, androgens), the extent to which these  
3 hormones can be generated in the fetal adrenal gland remains to be fully elucidated. Recent  
4 studies have looked at expression of key components of these pathways, or attempted to  
5 measure the major steroid hormones and their metabolites directly<sup>38,39</sup>. Here, we show that  
6 the FZ has the transcriptomic machinery to secrete large amounts of adrenal androgens,  
7 such as DHEA(S). Precursors are shunted into this pathway due to the lack of *HSD3B2*  
8 (encoding 3 $\beta$ -hydroxysteroid dehydrogenase type 2). Expression of the adrenocorticotropin  
9 (ACTH) receptor (*MC2R*) and its accessory protein (*MRAP*) increased with age, and showed  
10 strong expression in the FZ region. This finding is in keeping with ACTH-dependent  
11 stimulation of androgens in fetal adrenal cell or tissue cultures, suggesting the FZ androgen  
12 biosynthesis has the capacity to be ACTH-driven<sup>79–81</sup>.

13  
14 In contrast, glucocorticoid biosynthesis (e.g. cortisol) requires *HSD3B2* expression.  
15 Consistent with two previous reports<sup>37,39</sup>, we detected a potential transient increase in  
16 *HSD3B2* at around 8.5 wpc, but expression was more consistent by 19wpc in DZ cells that  
17 often co-expressed *CYP21A2* (encoding 21-hydroxylase) and *CYP11B1* (encoding 11  $\beta$ -  
18 hydroxylase). Very limited expression of the genes required for mineralocorticoid  
19 biosynthesis (e.g. aldosterone) was seen early on, but a small proportion of DZ cells did  
20 express *CYP11B2* together with other relevant enzymes by 19wpc. This finding is consistent  
21 with a lack of aldosterone synthesis in the first half of gestation, although increases in  
22 *CYP11B2* expression towards the end of the second trimester suggest the capacity for  
23 aldosterone synthesis is being established<sup>38,39</sup>. Of note, pre-term babies often have  
24 hypotension and salt-loss, which may in part be due to immature development of  
25 mineralocorticoid biosynthesis, as well as relative mineralocorticoid resistance.  
26 Understanding the dynamic transcriptomic and physiological changes around this time is  
27 key.

28  
29 Two key transcription factors (TFs) that regulate fetal adrenal development are the nuclear  
30 receptors *NROB1* (DAX-1) and *NR5A1* (SF-1)<sup>15,20,22,23,82</sup>. These genes encode two important  
31 nuclear receptors within a “core” set of 17 transcription factors identified, that were  
32 consistently differentially expressed in the adrenal cortex across time. Another transcription



1 regulator identified that was remarkable for its consistent differential expression in the DZ  
2 compared to the FZ was *HOPX*<sup>52</sup>. *HOPX* is an atypical homeobox factor that lacks direct DNA  
3 binding and likely interacts with transcriptional regulators<sup>52</sup>, so is not universally classified as  
4 a TF. Nevertheless, *HOPX* is emerging as a key embryonic and adult stem cell marker  
5 involved in stem cell maintenance/quiescence<sup>83,84</sup> and controlled tissue differentiation<sup>52</sup>.  
6 *HOPX* is reported to play a role in the development of mesoderm progenitor  
7 cells/hematopoietic stem cells<sup>84,85</sup>, osteogenic cells, neuronal tissue<sup>83</sup>, cardiomyoblasts<sup>86</sup>,  
8 intestinal crypt/colonic cells<sup>53,87</sup>, skin<sup>88</sup>, alveolar epithelial cells (Type I)<sup>89</sup> and endometrium.  
9 *HOPX* can influence tissue repair and regeneration<sup>87</sup>, and reduced *HOPX* expression  
10 (through promoter methylation) is associated with several cancers (e.g. colon<sup>53</sup>, breast<sup>90</sup>,  
11 thyroid, pancreas<sup>91</sup>) and metastasis risk (e.g. nasopharyngeal<sup>92</sup>), suggesting *HOPX* acts as a  
12 tumor suppressor. Interactions with WNT signalling<sup>86</sup>, activated SMAD<sup>86</sup> and CXCL12<sup>84</sup> have  
13 also been proposed. Our findings support a recent report of *HOPX* expression in early  
14 human adrenal development<sup>18</sup>, but suggest a developmentally-important time course for  
15 *HOPX* into later gestation and postnatal life. We show clearly that *HOPX* is expressed at the  
16 outer boundary of the developing DZ, close to the mesenchymal layer initially and in the  
17 subcapsular part of the DZ later. Given the decrease of *HOPX* with age, it is possible that  
18 *HOPX* plays a role in maintaining controlled cell proliferation and growth in the developing  
19 DZ. Of note, Xing et al showed in 2010 that *HOPX* is downregulated following ACTH  
20 stimulation in studies of both adult and fetal adrenal cells *in vitro*, whereas ACTH stimulates  
21 synthesis of steroidogenic enzymes<sup>79</sup>. Coupled with our observation of strongest  
22 *MC2R/MRAP* expression in the FZ, we hypothesize that ACTH and the ACTH pathway may  
23 promote adrenal differentiation not only through upregulating steroidogenesis, but through  
24 downregulating *HOPX/HOPX* and allowing cells to actively differentiate. Certainly, the role  
25 for *HOPX* in defining the DZ during early development and differentiation warrants further  
26 investigation.

27

28 As the adrenal gland arises from a condensation of intermediate mesoderm/mesenchyme at  
29 around 4wpc, we also focussed on mesenchyme-cortex interactions during the earliest  
30 phase of development investigated (6wpc to 8wpc). Indeed, IHC and spatial transcriptomic  
31 analysis clearly showed the adrenal gland developing within an outer ring of mesenchymal  
32 cells next to a mesenchymal “pedicle”. The early adrenal gland had a bulk transcriptomic

1 profile closer to the kidney (mesoderm) initially that became increasingly distinct with time,  
2 as the relative proportion of mesenchymal cells diminished and that of adrenal-specific cells  
3 increases. By studying mesenchymal-cortex clusters at 6wpc we identified a potential  
4 trajectory of cells differentiating from the mesenchyme to the cortex, consistent with a pool  
5 of progenitor cells in region, which ultimately locate within the subcapsular region<sup>28,93,94</sup>.  
6 Several different signaling systems have been proposed to regulate mesenchyme-cortex  
7 interactions from studies in the mouse.<sup>25–28,80,95</sup> Using an unsupervised approach of  
8 CellPhoneDB<sup>54</sup> to identify ligand-receptor interactions, we found that Rspodin-3 (*RSPO3*)  
9 could have an important role. Rspodin-3 is a component of the WNT-signalling pathway  
10 and has been shown to be expressed in the subcapsular region of cells in the developing  
11 mouse adrenal gland<sup>55</sup>, as well as in subcapsular cells in the 8wpc human adrenal gland<sup>18</sup>,  
12 and potentially mediates a gradient of WNT signalling involved in adrenal zonation.  
13 Although interactions with LGR5 have been suggested<sup>55</sup>, we identified LGR4 as the most  
14 likely expressed putative cortex receptor. A potential role for CXCL12 (mesenchymal ligand)  
15 and CXCR4 (adrenal cortex receptor) was also identified. Other signaling systems proposed  
16 from mouse models (eg *Shh/Gli*) were not found to be strongly expressed in the developing  
17 human adrenal gland at this stage. Taken together, these data suggest the Rspodin3-driven  
18 WNT signalling has a key role in human adrenal development, as well as in mice.  
19  
20 Our findings also address how basic biological mechanisms relate to human disease. Our  
21 translational focus over the years has been on monogenic causes of PAI. In children and  
22 young people these conditions are often inherited and represent potentially life-threatening  
23 disorders needing prompt diagnosis and management<sup>9</sup>. Progress over the past three  
24 decades has identified around 30 single gene causes of PAI<sup>10</sup>, some of which are shown here  
25 to have specific developmental features (e.g., NR5A1/NROB1 as core transcriptional  
26 regulators<sup>23</sup>; MCM4 in S-phase cell division<sup>96</sup>). The novel differentially-expressed adrenal  
27 genes found in our analyses will provide candidate genes for new genetic causes of PAI in  
28 the future. Furthermore, the unexpected observation that several key genes associated with  
29 PAI are not differentially expressed, and the clinical conditions they cause generally present  
30 with PAI at a later age, suggests that a period of postnatal stress/decompensation is  
31 required for the adrenal insufficiency to manifest. Making an early diagnosis – potentially  
32 even through newborn genetic screening programmes – means a window of opportunity

1 exists to alter the disease course, or at least to predict the onset of PAI and avoid an adrenal  
2 crisis.

3

4 Insights into basic mechanisms of human adrenal development also have implications for  
5 better understanding the drivers of adrenal tumors. We have previously shown the  
6 opposing effects of variants in *CDKN1C/CDKN1C*, whereby gain-of-function of this cell-cycle  
7 repressor is associated with adrenal hypoplasia and IMAGe syndrome, and loss of function is  
8 associated with Beckwith-Wiedemann syndrome with an adrenal neoplasm risk<sup>65</sup>. In  
9 childhood especially, adrenocortical tumorigenesis has been linked to increased expression  
10 of NR5A1<sup>97-99</sup> and IGF2 (through aberrant regulation of the 11p H19/IGF2 imprinting  
11 locus)<sup>99-101</sup>, and IGF1R blockade has been explored as a treatment for adrenal tumors in  
12 experimental models and trials<sup>102-104</sup>. Thus, the association of imprinted genes (e.g.,  
13 *CDKN1C*, *IGF2*) with growth and tumor risk is emerging. More recently, CXCR4 expression  
14 has been used as a marker and potential therapeutic target in adrenal cancer<sup>105,106</sup>, as well  
15 as for clinical diagnostic imaging of aldosterone secreting adenomas using <sup>68</sup>Ga-pentixafor  
16 PET/CT<sup>107-110</sup>. Our findings also have relevance for the mechanisms of adrenal androgen  
17 synthesis and regulation in CAH (e.g., 21-hydroxylase deficiency)<sup>3,40,47</sup>, for insights into  
18 adrenarche and links between the FZ and zona reticularis<sup>5,111,112</sup>, and for potential  
19 “programming” of the hypothalamic-pituitary-adrenal (HPA) axis during development, which  
20 could have implications for postnatal variability in HPA axis function and stress  
21 responses<sup>113,114</sup>.

22

23 These data have several limitations. The developmental period of tissue accessibility was  
24 somewhat limited and a greater sample number over time would have provided more  
25 detailed data. Also, whilst scRNA-seq and spatial transcriptomic platforms provide  
26 significant new insight, the ability to obtain increased sequencing reads per cell, more cells  
27 sequenced per sample, or greater spatial resolution is always improving and will help  
28 address some of the hypotheses generated here in the future. Understanding anatomical  
29 and physiological relations during development will be key going forward, at gene  
30 transcription, RNA expression and protein levels, and integrating detailed histology and  
31 imaging with basic cell biology will be crucial, as we have attempted to do here.

32

1 In summary, this study highlights the unique developmental complexities of human fetal  
2 adrenal gland development up unto mid-gestation, and provides an integrated  
3 transcriptomic roadmap with potential long-term consequences for human health and  
4 disease.  
5

## 1 **Methods**

2

### 3 **Tissue samples**

4

5 Human embryonic and fetal tissue samples used for bulk-RNA seq, immunohistochemistry  
6 and microCT were obtained with ethical approval (REC references: 08/H0712/34+5,  
7 18/LO/0822, 08/H0906/21+5, 18/NE/0290) and informed consent from the Medical  
8 Research Council (MRC)/Wellcome Trust-funded Human Developmental Biology Resource  
9 (HDBR) (<http://www.hdbr.org>). HDBR is regulated by the U.K. Human Tissue Authority  
10 (HTA; [www.hta.gov.uk](http://www.hta.gov.uk)) and operates in accordance with the relevant HTA Codes of Practice.  
11 The age of embryos up to 8wpc was calculated based on Carnegie staging, whereas in older  
12 fetuses the age was estimated from foot length and knee-heel length in relation to standard  
13 growth data. Samples were karyotyped by G-banding or quantitative PCR (chromosomes 13,  
14 16, 18, 21, 22 and X and Y) to determine the sex of the embryo/fetus and to exclude any  
15 major chromosomal rearrangements or aneuploidies. The acquisition of adrenal samples  
16 used to generate scRNA-seq data and spatial transcriptomics has been described  
17 previously<sup>24</sup>, under the following studies: NHS National Research Ethics Service reference  
18 96/085 (fetal tissues) and the joint MRC/Wellcome Trust-funded HDBR (as above). An  
19 overview of all samples used in the study is provided in Supplementary Data 1. Samples  
20 were stored in the appropriate media or at -80°C until processing. Adrenal dimensions were  
21 measured to the nearest 0.5 mm, using a light microscope when necessary. Adrenal weights  
22 (single gland, 10% formalin) were measured on an analytical balance (Pioneer PX, Ohaus)  
23 after removal of surface liquid.

24

### 25 **Micro-focus computed tomography (micro-CT)**

26

27 The 17wpc adrenal gland studied (10% formalin) was immersed in 1.25% potassium tri-  
28 iodide (I<sub>2</sub>KI) at room temperature for 48 hours, then rinsed, dried and wax embedded<sup>115</sup>.  
29 Once hardened, excess wax was trimmed in order to preserve tissue shape, to reduce  
30 dehydration and movement artefact, and to optimize contact with the X-ray beam source.  
31 Micro-CT scans were carried out using a Nikon XTH225 ST scanner (Nikon Metrology, Tring,  
32 UK) with the following settings: Tungsten target, X-ray energy 110 kV, current 60 µA (power

1 6.6 Watts), exposure time 1420 ms, one frame per 3141 projections, detector gain 24 dB,  
2 and scan duration of 75 minutes. Modified Feldkamp filtered back projection algorithms  
3 were used for reconstructions within proprietary software (CTPro3D; Nikon Metrology) and  
4 post-processed using VG StudioMAX (Volume Graphics GmbH, Heidelberg, Germany) to  
5 create the images at 4.77  $\mu\text{m}$  isotropic voxel sizes.

6

## 7 **Bulk RNA-seq**

8

9 Total RNA was extracted from human fetal adrenal samples (n = 32; Fig. 1a, Supplementary  
10 Fig. 1) and controls (n=14, Fig. 1a, Supplementary Fig. 1, balanced across the age range)  
11 using the AllPrep DNA/RNA Mini Kit (Qiagen). cDNA libraries were prepared using the KAPA  
12 mRNA HyperPrep Kit (Roche) and subsequently sequenced on a NextSeq 500 sequencer  
13 (paired-end 43 bp) (Illumina) in a single run to reduce potential batch effects. Fastq files  
14 were processed by FastQC and aligned to the human genome (Ensembl, GRCh 38.86) using  
15 STAR (2.5.2a)<sup>116</sup>. The matrix containing uniquely mapped read counts was generated using  
16 featureCounts<sup>117</sup>, part of the R package Rsubread. Differential-expression analysis was  
17 performed using DESeq2<sup>118</sup>, using eight control samples instead of 14 where indicated to  
18 prevent duplication of specific tissue-types. Heatmaps for distances between samples and  
19 differentially expressed genes in adrenal vs. control samples were generated using the  
20 pheatmap library in R.

21

## 22 **Single-cell RNA-seq (scRNA-seq)**

23

24 Detailed methods have been reported previously for the single cell sequencing of the  
25 samples used, including fetal adrenal single-cell dissociation, 10X Chromium processing  
26 (Chromium Single Cell 3' kit) (10X Genomics), cDNA library preparation and sequencing  
27 (Illumina HiSeq 4000). A processed single cell matrix was generated as described before<sup>24</sup>  
28 with minor modifications. Unless specified, cycling cells were discarded from the analysis.  
29 The R package Seurat (v4.0.2)<sup>119</sup> was used for processing the single cell matrix. Briefly, the  
30 count matrix was normalized and 2000 highly variable genes chosen. After gene scaling,  
31 dimensionality reduction was performed using the first 75 principal components (PCs). The  
32 FindClusters and RunUMAP functions were used to identify clusters and to allow UMAP

1 visualization. The clustree package in R<sup>120</sup> was used to select the resolution parameter for  
2 clustering. Differentially-expressed genes between clusters were calculated using the  
3 FindAllMarkers or FindMarkers functions using the parameters ‘min.pct=0.25 and  
4 logfc.threshold=0.25’ (Wilcoxon Rank Sum test). Internal functions in Seurat (FeaturePlot,  
5 RidgePlot) were used to visualize marker expression. The FeatureScatter function was used  
6 to generate plots for pair of genes. The dittoSeq Bioconductor package<sup>121</sup> was used to  
7 generate barplots, heatmaps and dotplots. RNA velocity on selected fetal adrenal samples  
8 was calculated using velocity and plotted using the velocity.R package in R as described  
9 before<sup>24</sup>. Adrenal cortex sample integration was performed using datasets normalized with  
10 SCT as described in vignettes (Seurat). Cell-cell communication by ligand-receptor  
11 interactions was calculated using CellPhoneDB v.2.0<sup>122</sup>.

12

### 13 **Histology/Immunohistochemistry (IHC)**

14

15 Human embryonic/fetal adrenal glands at four different ages (“late 6wpc”, 8.5wpc, 11wpc,  
16 20wpc) were fixed in 4% paraformaldehyde before being processed, embedded and  
17 sectioned for histological analysis and immunohistochemistry (IHC). Standard hematoxylin  
18 and eosin (H&E) staining was performed on 4µm sections to show key structural regions and  
19 vasculature. IHC was undertaken on 4µm sections using a Leica Bond-max automated  
20 platform (Leica Biosystems). In brief, sections first underwent antigen retrieval to unmask  
21 the epitope (Heat Induced Epitope Retrieval (HIER), Bond-max protocol F), endogenous  
22 activity was blocked with peroxidase using a Bond polymer refine kit (cat # DS9800), then  
23 incubation was undertaken with the relevant primary antibody for 1 hour. The following  
24 primary antibodies were used: VEGFR1 (Thermo Fisher PA1-21731, 1:100 dilution, HIER1 for  
25 20 mins), KI67 (Leica Ready to use clone K2 PA0230, 1:100, HIER 2 for 20 mins), NOV (Sigma  
26 Aldrich HPA019864, 1:100, HIER1 for 20 mins), SULT2A1 (Sigma Aldrich HPA041487, 1:100,  
27 HIER2 for 20 mins) and HOPX (Sigma Aldrich HPA030180, 1:100, HIER2 for 20 mins). Next,  
28 the post-primary antibody was applied to the sections (Bond polymer refine kit) and  
29 horseradish peroxidase (HRP) labelled polymer, followed by 3, 3-diaminobenzidine (DAB)  
30 chromogen solution to precipitate the locus of antigen-antibody interactions (all Bond  
31 polymer refine kit). Sections were counterstained with hematoxylin, washed in deionized  
32 water, dehydrated in graded alcohols, cleared in two xylene changes and mounted for light

1 microscopy. The stained slides were imaged on an Aperio CS2 Scanner (Leica Biosystems) at  
2 40x objective. Analysis was undertaken with QuPath (v.0.2.3) (<https://qupath.github.io>) and  
3 Leica ImageScope (Leica Biosystems) software.

4

5 Dual-staining was performed with anti-HOPX (1:100 dilution) and anti-NOV (1:100  
6 dilution) antibodies (as above) on 20wpc human fetal adrenal gland. Antigen retrieval was  
7 heat induced, HIER2 20 mins. Staining was performed sequentially on the  
8 Bondmax autostainer using anti-HOPX detected by brown chromogen (Bond polymer refine  
9 kit, cat # DS9800) and anti-NOV detected by red chromogen (Bond polymer Red kit, cat #  
10 DS9390).

11

## 12 **Spatial transcriptomic analysis**

13

14 Spatial transcriptomic analysis of a single adrenal gland (7wpc+5d) was undertaken based on  
15 a standard 10X Genomics Visium protocol (10X Genomics). In brief, the fresh adrenal sample  
16 was snap frozen and embedded in OCT. Cryosections (10  $\mu$ m) were cut and placed on Visium  
17 slides. Sections were fixed in cold methanol and stained with H&E to visualize the structures  
18 and tissue integrity, before permeabilization, reverse transcription and complementary DNA  
19 synthesis. Second-strand cDNA was liberated and libraries (Single-index) were generated by  
20 a PCR-based protocol. Libraries were sequenced on a HiSeq400 sequencer (Illumina).  
21 Sequencing data were aligned to GRCh38 human reference genome using Space Ranger  
22 Software to quantify gene counts in spots.

23

## 24 **Adult adrenal gland gene enrichment**

25

26 Data for the most highly differentially-expressed (enriched) adult adrenal gland genes was  
27 derived from the Human Protein Atlas, using the “tissue specificity score”. The tissue  
28 specificity score (TS) represents the fold-change between the expression level in adrenal  
29 gland and that in the tissue with the second-highest expression level  
30 (<https://www.proteinatlas.org/humanproteome/tissue/adrenal+gland>).

31

## 32 **Primary adrenal insufficiency (PAI): clinical presentation**



1

2 Data for the clinical age of presentation of children and young people with genetic causes of  
3 PAI was obtained from original case-series reports of classic and non-classic conditions using  
4 PubMed (<https://pubmed.ncbi.nlm.nih.gov/>; accessed July 2022). Relevant literature  
5 sources are shown in Supplementary Data 6. Where PAI is a rare association of a condition,  
6 or where limited data are currently available, all published individual case reports were  
7 reviewed by two observers (J.A., F.B.). “Early”-onset PAI was defined as having at least one  
8 report of an infant presenting with adrenal insufficiency within the first two weeks of life,  
9 and “late”-onset PAI after this time. PAI-associated genes were termed “adrenal specific” if  
10 bulk RNA-seq data showed greater expression of that gene in the adrenal gland compared to  
11 controls ( $\log_2FC > 2$ ,  $p_{adj} < 0.05$ ), and if expression in the integrated adrenal cortex cluster was  
12 high (Supplementary Data 5).

13

#### 14 **Statistical analysis**

15

16 Statistical analysis for bulk- and single-cell RNA-seq data is described above within packages  
17 of differential expression analysis, with adjustments for multiple corrections. Chi-square  
18 analysis was performed GraphPad (Prism). In all analyses, a p-value or adjusted p-value less  
19 than 0.05 was taken as significant.

20

21

1 **Data Availability**

2

3 **Data repository links**

4

5 Single-cell RNA-sequencing data are deposited in the European Genome-phenome Archive  
6 (accession code EGAD00001008345).

7 Bulk RNA-sequencing data are deposited in ArrayExpress/Biostudies (accession number E-  
8 MTAB-12492).

9

10 **Supplementary Files**

11

12 **Supplementary Movie 1:** Micro-CT of fetal adrenal gland at 17wpc

13 **Supplementary Figures:** Supplementary figures 1-18

14 **Supplementary Data 1:** Overview of samples included in the study (phenodata)

15 **Supplementary Data 2:** Bulk RNA-seq differentially expressed genes (adrenal vs controls)

16 **Supplementary Data 3:** Gene expression markers (single cell clusters)

17 **Supplementary Data 4:** Adrenal cortex - transcription factors

18 **Supplementary Data 5:** Adrenal cortex - imprinted genes

19 **Supplementary Data 6:** Clinical data (age of presentation) and related references

20

## 1   **References**

2  
3  
4  
5  
6  
7  
8  
9  
10  
11  
12  
13  
14  
15  
16  
17  
18  
19  
20  
21  
22  
23  
24  
25  
26  
27  
28  
29  
30  
31  
32

1. Pignatti, E., du Toit, T. & Flück, C. E. Development and function of the fetal adrenal. *Rev. Endocr. Metab. Disord.* (2022) doi:10.1007/s11154-022-09756-3.
2. Xing, Y., Lerario, A. M., Rainey, W. & Hammer, G. D. Development of adrenal cortex zonation. *Endocrinol. Metab. Clinics North Am.* **44**, 243–74 (2015).
3. Miller, W. L. & Auchus, R. J. The molecular biology, biochemistry, and physiology of human steroidogenesis and its disorders. *Endocr. Rev.* **32**, 81–151 (2011).
4. Storbeck, K.-H. *et al.* Steroid metabolome analysis in disorders of adrenal steroid biosynthesis and metabolism. *Endocr. Rev.* **40**, 1605–1625 (2019).
5. Rosenfield, R. L. Normal and premature adrenarche. *Endocr. Rev.* **42**, 783–814 (2021).
6. Wierman, M. E. *et al.* Androgen therapy in women: a reappraisal: an Endocrine Society clinical practice guideline. *J. Clin. Endocrinol. Metab.* **99**, 3489–510 (2014).
7. Bennett, G., Cussen, L. & O’Reilly, M. W. The role for long-term use of dehydroepiandrosterone in adrenal insufficiency. *Curr. Opin. Endocrinol. Diabetes. Obes.* **29**, 284–293 (2022).
8. Bechmann, N., Berger, I., Bornstein, S. R. & Steenblock, C. Adrenal medulla development and medullary-cortical interactions. *Mol. Cell. Endocrinol.* **528**, 111258 (2021).
9. Bornstein, S. R. *et al.* Diagnosis and treatment of primary adrenal insufficiency: An Endocrine Society clinical practice guideline. *J. Clin. Endocrinol. Metab.* **101**, 364–89 (2016).
10. Buonocore, F., McGlacken-Byrne, S. M., Del Valle, I. & Achermann, J. C. Current insights into adrenal insufficiency in the newborn and young infant. *Front. Pediatr.* **8**, 619041 (2020).
11. Hahner, S. *et al.* Adrenal insufficiency. *Nat. Rev. Dis. Prim.* **7**, 19 (2021).
12. Guran, T. *et al.* Rare causes of primary adrenal insufficiency: Genetic and clinical characterization of a large nationwide cohort. *J. Clin. Endocrinol. Metab.* **101**, 284–292 (2016).
13. Buonocore, F. *et al.* Genetic analysis of pediatric primary adrenal insufficiency of unknown etiology: 25 years’ experience in the UK. *J. Endocr. Soc.* **5**, bvab086 (2021).
14. Buonocore, F. & Achermann, J. C. Primary adrenal insufficiency: New genetic causes

- 1 and their long-term consequences. *Clin. Endocrinol. (Oxf)*. **92**, 11–20 (2020).
- 2 15. Hanley, N. A., Rainey, W. E., Wilson, D. I., Ball, S. G. & Parker, K. L. Expression profiles  
3 of SF-1, DAX1, and CYP17 in the human fetal adrenal gland: potential interactions in  
4 gene regulation. *Mol. Endocrinol.* **15**, 57–68 (2001).
- 5 16. Ishimoto, H. & Jaffe, R. B. Development and function of the human fetal adrenal  
6 cortex: a key component in the feto-placental unit. *Endocr. Rev.* **32**, 317–55 (2011).
- 7 17. Pignatti, E. & Flück, C. E. Adrenal cortex development and related disorders leading to  
8 adrenal insufficiency. *Mol. Cell. Endocrinol.* **527**, 111206 (2021).
- 9 18. Cheng, K. *et al.* The developmental origin and the specification of the adrenal cortex  
10 in humans and cynomolgus monkeys. *Sci. Adv.* **8**, eabn8485 (2022).
- 11 19. Hanley, N. A. *et al.* Expression of steroidogenic factor 1 and Wilms' tumour 1 during  
12 early human gonadal development and sex determination. *Mech. Dev.* **87**, 175–80  
13 (1999).
- 14 20. Del Valle, I. *et al.* A genomic atlas of human adrenal and gonad development.  
15 *Wellcome Open Res.* **2**, 25 (2017).
- 16 21. Garcia-Alonso, L. *et al.* Single-cell roadmap of human gonadal development. *Nature*  
17 **607**, 540–547 (2022).
- 18 22. Luo, X., Ikeda, Y. & Parker, K. L. A cell-specific nuclear receptor is essential for adrenal  
19 and gonadal development and sexual differentiation. *Cell* **77**, 481–90 (1994).
- 20 23. Suntharalingham, J. P., Buonocore, F., Duncan, A. J. & Achermann, J. C. DAX-1  
21 (NROB1) and steroidogenic factor-1 (SF-1, NR5A1) in human disease. *Best Pract. Res.*  
22 *Clin. Endocrinol. Metab.* **29**, 607–19 (2015).
- 23 24. Kildisiute, G. *et al.* Tumor to normal single-cell mRNA comparisons reveal a pan-  
24 neuroblastoma cancer cell. *Sci. Adv.* **7**, eabd3311 (2021).
- 25 25. Lerario, A. M., Finco, I., LaPensee, C. & Hammer, G. D. Molecular mechanisms of  
26 stem/progenitor cell maintenance in the adrenal cortex. *Front. Endocrinol.*  
27 *(Lausanne)*. **8**, 52 (2017).
- 28 26. Dumontet, T. *et al.* Adrenocortical development: Lessons from mouse models. *Ann.*  
29 *Endocrinol. (Paris)*. **79**, 95–97 (2018).
- 30 27. Abou Nader, N. & Boyer, A. Adrenal cortex development and maintenance:  
31 Knowledge acquired from mouse models. *Endocrinology* **162**, (2021).
- 32 28. Hammer, G. D. & Basham, K. J. Stem cell function and plasticity in the normal

- 1            physiology of the adrenal cortex. *Mol. Cell. Endocrinol.* **519**, 111043 (2021).
- 2    29.    Weger, M. *et al.* Expression and activity profiling of the steroidogenic enzymes of  
3            glucocorticoid biosynthesis and the fdx1 co-factors in zebrafish. *J. Neuroendocrinol.*  
4            **30**, e12586 (2018).
- 5    30.    Mesiano, S. & Jaffe, R. B. Developmental and functional biology of the primate fetal  
6            adrenal cortex. *Endocr. Rev.* **18**, 378–403 (1997).
- 7    31.    Spencer, S. J., Mesiano, S., Lee, J. Y. & Jaffe, R. B. Proliferation and apoptosis in the  
8            human adrenal cortex during the fetal and perinatal periods: implications for growth  
9            and remodeling. *J. Clin. Endocrinol. Metab.* **84**, 1110–5 (1999).
- 10   32.    Greaves, R. F. *et al.* A tale of two steroids: The importance of the androgens DHEA  
11            and DHEAS for early neurodevelopment. *J. Steroid Biochem. Mol. Biol.* **188**, 77–85  
12            (2019).
- 13   33.    Xing, Y., Morohashi, K.-I., Ingraham, H. A. & Hammer, G. D. Timing of adrenal  
14            regression controlled by synergistic interaction between Sf1 SUMOylation and Dax1.  
15            *Development* **144**, 3798–3807 (2017).
- 16   34.    Gannon, A.-L. *et al.* Androgen receptor signalling in the male adrenal facilitates X-  
17            zone regression, cell turnover and protects against adrenal degeneration during  
18            ageing. *Sci. Rep.* **9**, 10457 (2019).
- 19   35.    Gannon, A.-L. *et al.* Androgen receptor Is dispensable for X-Zone regression in the  
20            female adrenal but regulates post-partum corticosterone levels and protects cortex  
21            integrity. *Front. Endocrinol. (Lausanne)*. **11**, 599869 (2020).
- 22   36.    Rainey, W. E., Carr, B. R., Wang, Z. N. & Parker, C. R. Gene profiling of human fetal  
23            and adult adrenals. *J. Endocrinol.* **171**, 209–15 (2001).
- 24   37.    Goto, M. *et al.* In humans, early cortisol biosynthesis provides a mechanism to  
25            safeguard female sexual development. *J. Clin. Invest.* **116**, 953–60 (2006).
- 26   38.    Johnston, Z. C. *et al.* The human fetal adrenal produces cortisol but no detectable  
27            aldosterone throughout the second trimester. *BMC Med.* **16**, 23 (2018).
- 28   39.    Melau, C. *et al.* Characterization of human adrenal steroidogenesis during fetal  
29            development. *J. Clinical Endocrinol. Metab.* **104**, 1802–1812 (2019).
- 30   40.    Reisch, N. *et al.* Alternative pathway androgen biosynthesis and human fetal female  
31            virilization. *Proc. Natl. Acad. Sci. U. S. A.* **116**, 22294–22299 (2019).
- 32   41.    Ratcliffe, J., Nakanishi, M. & Jaffe, R. B. Identification of definitive and fetal zone

- 1 markers in the human fetal adrenal gland reveals putative developmental genes. *J.*  
2 *Clin. Endocrinol. Metab.* **88**, 3272–7 (2003).
- 3 42. Doghman, M. *et al.* Nephroblastoma overexpressed/cysteine-rich protein  
4 61/connective tissue growth factor/nephroblastoma overexpressed gene-3  
5 (NOV/CCN3), a selective adrenocortical cell proapoptotic factor, is down-regulated in  
6 childhood adrenocortical tumors. *J. Clin. Endocrinol. Metab.* **92**, 3253–60 (2007).
- 7 43. Zajicek, G., Ariel, I. & Arber, N. The streaming adrenal cortex: direct evidence of  
8 centripetal migration of adrenocytes by estimation of cell turnover rate. *J. Endocrinol.*  
9 **111**, 477–82 (1986).
- 10 44. Zubair, M., Parker, K. L. & Morohashi, K. Developmental links between the fetal and  
11 adult zones of the adrenal cortex revealed by lineage tracing. *Mol. Cell. Biol.* **28**,  
12 7030–40 (2008).
- 13 45. Freedman, B. D. *et al.* Adrenocortical zonation results from lineage conversion of  
14 differentiated zona glomerulosa cells. *Dev. Cell* **26**, 666–673 (2013).
- 15 46. Dumontet, T. *et al.* PKA signaling drives reticularis differentiation and sexually  
16 dimorphic adrenal cortex renewal. *JCI Insight* **3**, (2018).
- 17 47. Turcu, A. F., Rege, J., Auchus, R. J. & Rainey, W. E. 11-Oxygenated androgens in health  
18 and disease. *Nat. Rev. Endocrinol.* **16**, 284–296 (2020).
- 19 48. Hu, H. *et al.* AnimalTFDB 3.0: a comprehensive resource for annotation and prediction  
20 of animal transcription factors. *Nucleic Acids Res.* **47**, D33–D38 (2019).
- 21 49. Muscatelli, F. *et al.* Mutations in the DAX-1 gene give rise to both X-linked adrenal  
22 hypoplasia congenita and hypogonadotropic hypogonadism. *Nature* **372**, 672–6  
23 (1994).
- 24 50. Achermann, J. C., Ito, M., Ito, M., Hindmarsh, P. C. & Jameson, J. L. A mutation in the  
25 gene encoding steroidogenic factor-1 causes XY sex reversal and adrenal failure in  
26 humans [1]. *Nature Genetics* vol. 22 125–126 at <https://doi.org/10.1038/9629> (1999).
- 27 51. Ito, M., Yu, R. & Jameson, J. L. DAX-1 inhibits SF-1-mediated transactivation via a  
28 carboxy-terminal domain that is deleted in adrenal hypoplasia congenita. *Mol. Cell.*  
29 *Biol.* **17**, 1476–83 (1997).
- 30 52. Caspa Gokulan, R., Yap, L. F. & Paterson, I. C. HOPX: A Unique Homeodomain Protein  
31 in Development and Tumor Suppression. *Cancers (Basel)*. **14**, (2022).
- 32 53. Dmitrieva-Posocco, O. *et al.*  $\beta$ -Hydroxybutyrate suppresses colorectal cancer. *Nature*

- 1           **605**, 160–165 (2022).
- 2   54.   Efremova, M., Vento-Tormo, M., Teichmann, S. A. & Vento-Tormo, R. CellPhoneDB:  
3        inferring cell-cell communication from combined expression of multi-subunit ligand-  
4        receptor complexes. *Nat. Protoc.* **15**, 1484–1506 (2020).
- 5   55.   Vidal, V. *et al.* The adrenal capsule is a signaling center controlling cell renewal and  
6        zonation through Rspo3. *Genes Dev.* **30**, 1389–94 (2016).
- 7   56.   Basham, K. J. *et al.* A ZNRF3-dependent Wnt/ $\beta$ -catenin signaling gradient is required  
8        for adrenal homeostasis. *Genes Dev.* **33**, 209–220 (2019).
- 9   57.   Lyraki, R. & Schedl, A. Adrenal cortex renewal in health and disease. *Nat. Rev.*  
10       *Endocrinol.* **17**, 421–434 (2021).
- 11  58.   Eggermann, T. *et al.* Growth restriction and genomic imprinting-overlapping  
12        phenotypes support the concept of an imprinting network. *Genes (Basel)*. **12**, (2021).
- 13  59.   Monk, D., Mackay, D. J. G., Eggermann, T., Maher, E. R. & Riccio, A. Genomic  
14        imprinting disorders: lessons on how genome, epigenome and environment interact.  
15        *Nat. Rev. Genet.* **20**, 235–248 (2019).
- 16  60.   Meimaridou, E. *et al.* Mutations in NNT encoding nicotinamide nucleotide  
17        transhydrogenase cause familial glucocorticoid deficiency. *Nat. Genet.* **44**, 740 (2012).
- 18  61.   Handschug, K. *et al.* Triple A syndrome is caused by mutations in AAAS, a new WD-  
19        repeat protein gene. *Hum. Mol. Genet.* **10**, 283–290 (2001).
- 20  62.   Prasad, R. *et al.* Sphingosine-1-phosphate lyase mutations cause primary adrenal  
21        insufficiency and steroid-resistant nephrotic syndrome. *J. Clin. Invest.* **127**, 942–953  
22        (2017).
- 23  63.   Zhu, J. *et al.* The changing face of adrenoleukodystrophy. *Endocr. Rev.* **41**, (2020).
- 24  64.   Hughes, C. R. *et al.* MCM4 mutation causes adrenal failure, short stature, and natural  
25        killer cell deficiency in humans. *J. Clin. Invest.* **122**, 814–820 (2012).
- 26  65.   Arboleda, V. A. *et al.* Mutations in the PCNA-binding domain of CDKN1C cause IMAGE  
27        syndrome. *Nat. Genet.* **44**, 788–792 (2012).
- 28  66.   Buonocore, F. *et al.* Somatic mutations and progressive monosomy modify SAMD9-  
29        related phenotypes in humans. *J. Clin. Invest.* **127**, 1700–1713 (2017).
- 30  67.   Voutilainen, R. *et al.* Parallel regulation of parentally imprinted H19 and insulin-like  
31        growth factor-II genes in cultured human fetal adrenal cells. *Endocrinology* **134**,  
32        2051–6 (1994).

- 1 68. Halder, S. K. *et al.* Cloning of a membrane-spanning protein with epidermal growth  
2 factor-like repeat motifs from adrenal glomerulosa cells. *Endocrinology* **139**, 3316–28  
3 (1998).
- 4 69. Raza, F. S., Puddefoot, J. R. & Vinson, G. P. Pref-1, SF-1 and adrenocortical zonation.  
5 *Endocr. Res.* **24**, 977–81 (1998).
- 6 70. Hadjidemetriou, I. *et al.* DLK1/PREF1 marks a novel cell population in the human  
7 adrenal cortex. *J. Steroid Biochem. Mol. Biol.* **193**, 105422 (2019).
- 8 71. Simcock, I. C., Shelmerdine, S. C., Hutchinson, J. C., Sebire, N. J. & Arthurs, O. J.  
9 Human fetal whole-body postmortem microfocus computed tomographic imaging.  
10 *Nat. Protoc.* **16**, 2594–2614 (2021).
- 11 72. Shifren, J. L., Mesiano, S., Taylor, R. N., Ferrara, N. & Jaffe, R. B. Corticotropin  
12 regulates vascular endothelial growth factor expression in human fetal adrenal  
13 cortical cells. *J. Clin. Endocrinol. Metab.* **83**, 1342–7 (1998).
- 14 73. Ishimoto, H. *et al.* The periphery of the human fetal adrenal gland is a site of  
15 angiogenesis: zonal differential expression and regulation of angiogenic factors. *J.*  
16 *Clin. Endocrinol. Metab.* **93**, 2402–8 (2008).
- 17 74. Ferraz-de-Souza, B. *et al.* ChIP-on-chip analysis reveals angiopoietin 2 (Ang2, ANGPT2)  
18 as a novel target of steroidogenic factor-1 (SF-1, NR5A1) in the human adrenal gland.  
19 *FASEB J.* **25**, 1166–75 (2011).
- 20 75. Pereira, S. S., Oliveira, S., Monteiro, M. P. & Pignatelli, D. Angiogenesis in the normal  
21 adrenal fetal cortex and adrenocortical tumors. *Cancers (Basel)*. **13**, (2021).
- 22 76. Schinner, S. & Bornstein, S. R. Cortical-chromaffin cell interactions in the adrenal  
23 gland. *Endocr. Pathol.* **16**, 91–8 (2005).
- 24 77. Charmandari, E. *et al.* Adrenomedullary function may predict phenotype and  
25 genotype in classic 21-hydroxylase deficiency. *J. Clin. Endocrinol. Metab.* **87**, 3031–7  
26 (2002).
- 27 78. Weber, J. *et al.* Low adrenomedullary function predicts acute illness in infants with  
28 classical congenital adrenal hyperplasia. *J. Clinical Endocrinol. Metab.* **107**, e264–e271  
29 (2022).
- 30 79. Xing, Y., Parker, C. R., Edwards, M. & Rainey, W. E. ACTH is a potent regulator of gene  
31 expression in human adrenal cells. *J. Mol. Endocrinol.* **45**, 59–68 (2010).
- 32 80. Melau, C. *et al.* Establishment of a novel human fetal adrenal culture model that



- 1 supports de novo and manipulated steroidogenesis. *J. Clin. Endocrinol. Metab.* **106**,  
2 843–857 (2021).
- 3 81. Melau, C. *et al.* The effects of selected inhibitors on human fetal adrenal  
4 steroidogenesis differs under basal and ACTH-stimulated conditions. *BMC Med.* **19**,  
5 204 (2021).
- 6 82. Achermann, J. C., Schwabe, J., Fairall, L. & Chatterjee, K. Genetic disorders of nuclear  
7 receptors. *Journal of Clinical Investigation* vol. 127 1181–1192 at  
8 <https://doi.org/10.1172/JCI88892> (2017).
- 9 83. Berg, D. A. *et al.* A common embryonic origin of stem cells drives developmental and  
10 adult neurogenesis. *Cell* **177**, 654–668.e15 (2019).
- 11 84. Lin, C.-C. *et al.* Knock-out of Hopx disrupts stemness and quiescence of hematopoietic  
12 stem cells in mice. *Oncogene* **39**, 5112–5123 (2020).
- 13 85. Palpant, N. J. *et al.* Chromatin and transcriptional analysis of mesoderm progenitor  
14 cells Identifies HOPX as a regulator of primitive hematopoiesis. *Cell Rep.* **20**, 1597–  
15 1608 (2017).
- 16 86. Jain, R. *et al.* HEART DEVELOPMENT. Integration of Bmp and Wnt signaling by Hopx  
17 specifies commitment of cardiomyoblasts. *Science* **348**, aaa6071 (2015).
- 18 87. Wang, Y. *et al.* Long-term culture captures injury-repair Cycles of colonic stem cells.  
19 *Cell* **179**, 1144–1159.e15 (2019).
- 20 88. Mariotto, A., Pavlova, O., Park, H.-S., Huber, M. & Hohl, D. HOPX: The unusual  
21 homeodomain-containing protein. *J. Invest. Dermatol.* **136**, 905–911 (2016).
- 22 89. Jain, R. *et al.* Plasticity of Hopx(+) type I alveolar cells to regenerate type II cells in the  
23 lung. *Nat. Commun.* **6**, 6727 (2015).
- 24 90. Kikuchi, M. *et al.* Epigenetic silencing of HOPX contributes to cancer aggressiveness in  
25 breast cancer. *Cancer Lett.* **384**, 70–78 (2017).
- 26 91. Ushiku, H. *et al.* Homeobox-only protein expression Is a critical prognostic indicator of  
27 pancreatic neuroendocrine tumor and Is regulated by promoter DNA  
28 hypermethylation. *Pancreas* **45**, 1255–1262 (2016).
- 29 92. Ren, X. *et al.* HOPX hypermethylation promotes metastasis via activating SNAIL  
30 transcription in nasopharyngeal carcinoma. *Nat. Commun.* **8**, 14053 (2017).
- 31 93. Wood, M. A. *et al.* Fetal adrenal capsular cells serve as progenitor cells for  
32 steroidogenic and stromal adrenocortical cell lineages in *M. musculus*. *Development*

- 1           **140**, 4522–32 (2013).
- 2   94.   Walczak, E. M. & Hammer, G. D. Regulation of the adrenocortical stem cell niche:  
3       implications for disease. *Nat. Rev. Endocrinol.* **11**, 14–28 (2015).
- 4   95.   Little, D. W., Dumontet, T., LaPensee, C. R. & Hammer, G. D.  $\beta$ -catenin in adrenal  
5       zonation and disease. *Mol. Cell. Endocrinol.* **522**, 111120 (2021).
- 6   96.   Hughes, C. R. *et al.* MCM4 mutation causes adrenal failure, short stature, and natural  
7       killer cell deficiency in humans. *J. Clin. Invest.* **122**, 814–20 (2012).
- 8   97.   Figueiredo, B. C. *et al.* Amplification of the steroidogenic factor 1 gene in childhood  
9       adrenocortical tumors. *J. Clin. Endocrinol. Metab.* **90**, 615–9 (2005).
- 10  98.   Pianovski, M. A. D. *et al.* SF-1 overexpression in childhood adrenocortical tumours.  
11       *Eur. J. Cancer* **42**, 1040–3 (2006).
- 12  99.   El Wakil, A. *et al.* Genetics and genomics of childhood adrenocortical tumors. *Mol.*  
13       *Cell. Endocrinol.* **336**, 169–73 (2011).
- 14  100.  Wilkin, F., Gagné, N., Paquette, J., Oligny, L. L. & Deal, C. Pediatric adrenocortical  
15       tumors: molecular events leading to insulin-like growth factor II gene overexpression.  
16       *J. Clinical Endocrinol. Metab.* **85**, 2048–56 (2000).
- 17  101.  Nielsen, H. M. *et al.* Copy number variations alter methylation and parallel IGF2  
18       overexpression in adrenal tumors. *Endocr. Relat. Cancer* **22**, 953–67 (2015).
- 19  102.  Barlaskar, F. M. *et al.* Preclinical targeting of the type I insulin-like growth factor  
20       receptor in adrenocortical carcinoma. *J. Clin. Endocrinol. Metab.* **94**, 204–12 (2009).
- 21  103.  Lerario, A. M. *et al.* The combination of insulin-like growth factor receptor 1 (IGF1R)  
22       antibody cixutumumab and mitotane as a first-line therapy for patients with  
23       recurrent/metastatic adrenocortical carcinoma: a multi-institutional NCI-sponsored  
24       trial. *Horm. Cancer* **5**, 232–9 (2014).
- 25  104.  Catalano, R. *et al.* The cytoskeleton actin binding protein filamin A impairs both IGF2  
26       mitogenic effects and the efficacy of IGF1R inhibitors in adrenocortical cancer cells.  
27       *Cancer Lett.* **497**, 77–88 (2021).
- 28  105.  Weiss, I. D. *et al.* Screening of cancer tissue arrays identifies CXCR4 on adrenocortical  
29       carcinoma: correlates with expression and quantification on metastases using <sup>64</sup>Cu-  
30       plerixafor PET. *Oncotarget* **8**, 73387–73406 (2017).
- 31  106.  Bluemel, C. *et al.* Investigating the chemokine receptor 4 as potential theranostic  
32       target in adrenocortical cancer patients. *Clin. Nucl. Med.* **42**, e29–e34 (2017).

- 1 107. Heinze, B. *et al.* Targeting CXCR4 (CXC chemokine receptor type 4) for molecular  
2 imaging of aldosterone-producing adenoma. *Hypertension* **71**, 317–325 (2018).
- 3 108. Ding, J. *et al.* Imaging CXCR4 expression in patients with suspected primary  
4 hyperaldosteronism. *Eur. J. Nucl. Med. Mol. Imaging* **47**, 2656–2665 (2020).
- 5 109. Chaman Baz, A. H. *et al.* CXCR4-directed [68Ga]Ga-PentixaFor PET/CT versus adrenal  
6 vein sampling performance: a study protocol for a randomised two-step controlled  
7 diagnostic Trial Ultimately comparing hypertension outcome in primary  
8 aldosteronism (CASTUS). *BMJ Open* **12**, e060779 (2022).
- 9 110. Gao, Y. *et al.* Functional nodules in primary aldosteronism: identification of CXCR4  
10 expression with 68Ga-pentixafor PET/CT. *Eur. Radiol.* (2022) doi:10.1007/s00330-022-  
11 09058-x.
- 12 111. Baquedano, M. S. *et al.* Expression of the IGF system in human adrenal tissues from  
13 early infancy to late puberty: implications for the development of adrenarche.  
14 *Pediatr. Res.* **58**, 451–8 (2005).
- 15 112. Rege, J. *et al.* Transcriptome profiling reveals differentially expressed transcripts  
16 between the human adrenal zona fasciculata and zona reticularis. *J. Clin. Endocrinol.*  
17 *Metab.* **99**, E518-27 (2014).
- 18 113. Charmandari, E., Achermann, J. C., Carel, J. C., Soder, O. & Chrousos, G. P. Stress  
19 response and child health. in *Science Signaling* vol. 5 (2012).
- 20 114. Pervanidou, P. & Chrousos, G. P. Early-life stress: From neuroendocrine mechanisms  
21 to stress-related disorders. *Horm. Res. Paediatr.* **89**, 372–379 (2018).
- 22 115. Simcock, I. C. *et al.* Investigation of optimal sample preparation conditions with  
23 potassium triiodide and optimal imaging settings for microfocus computed  
24 tomography of excised cat hearts. *Am. J. Vet. Res.* **81**, 326–333 (2020).
- 25 116. Dobin, A. *et al.* STAR: ultrafast universal RNA-seq aligner. *Bioinformatics* **29**, 15–21  
26 (2013).
- 27 117. Liao, Y., Smyth, G. K. & Shi, W. featureCounts: an efficient general purpose program  
28 for assigning sequence reads to genomic features. *Bioinformatics* **30**, 923–930 (2014).
- 29 118. Love, M. I., Huber, W. & Anders, S. Moderated estimation of fold change and  
30 dispersion for RNA-seq data with DESeq2. *Genome Biol.* **15**, 550 (2014).
- 31 119. Stuart, T. *et al.* Comprehensive Integration of Single-Cell Data. *Cell* **177**, 1888-  
32 1902.e21 (2019).

- 1 120. Zappia, L. & Oshlack, A. Clustering trees: a visualization for evaluating clusterings at  
2 multiple resolutions. *Gigascience* **7**, (2018).
- 3 121. Bunis, D. G., Andrews, J., Fragiadakis, G. K., Burt, T. D. & Sirota, M. dittoSeq: universal  
4 user-friendly single-cell and bulk RNA sequencing visualization toolkit. *Bioinformatics*  
5 **36**, 5535–5536 (2021).
- 6 122. Efremova, M., Vento-Tormo, M., Teichmann, S. A. & Vento-Tormo, R. CellPhoneDB:  
7 inferring cell-cell communication from combined expression of multi-subunit ligand-  
8 receptor complexes. *Nat. Protoc.* **15**, 1484–1506 (2020).
- 9

## 1 **Acknowledgements**

2

3 This research was funded in whole, or in part, by the Wellcome Trust Grants 209328/Z/17/Z,  
4 216362/Z/19/Z, 206194, 211276/Z/18/Z, 108413/A/15/D, and 223135/Z/21/Z. For the  
5 purpose of Open Access, the author has applied a CC-BY public copyright license to any  
6 Author Accepted Manuscript version arising from this submission. J.C.A. had additional  
7 research support from Great Ormond Street Hospital Children's Charity (grant V2518). ICS is  
8 funded by the National Institute of Health Research (NIHR) (ICA-CDRF-2017-03-53 and  
9 NIHR302390). Human fetal material was provided by the Joint MRC/Wellcome Trust (Grant  
10 MR/R006237/1) Human Developmental Biology Resource (<http://www.hdbr.org>). Research  
11 at UCL Great Ormond Street Institute of Child Health is supported by the National Institute  
12 for Health Research, Great Ormond Street Hospital Biomedical Research Centre (grant IS-  
13 BRC-1215-20012). The views expressed are those of the authors and not necessarily those of  
14 the National Health Service, National Institute for Health Research, or Department of  
15 Health. The funders had no role in study design, data collection and analysis, decision to  
16 publish, or preparation of the manuscript. We also thank other members of the Human  
17 Developmental Biology Resource, UCL Genomics and Sanger Institute for their additional  
18 contributions to this work.

19

## 20 **Author contributions**

21 Author contributions were as follows. Study conceptualization: IdV, SB, JCA; Methodology:  
22 IdV, MDY, ICS; Investigation: IdV, MDY, OKO, ICS, FB, BC, NM, TB, PN, KS, JPS, SMM, UCL  
23 Genomics, JCA ; Formal analysis: IdV, MDY, GD, ISC, EK, FB; Data curation: IdV, MDY, FB;  
24 Resources: HDBR; Project administration: JCA; Supervision: OJA, SB, JCA; Validation: IdV,  
25 MDY, JCA; Visualization: IdV, OKO, ICS, FB, JCA; Writing – original draft: IdV, JCA; Writing –  
26 review & editing: All authors; Funding acquisition: SB, JCA.

27

## 28 **Declaration of Interests**

29 The authors declare no competing interests.

## Figures

Fig. 1

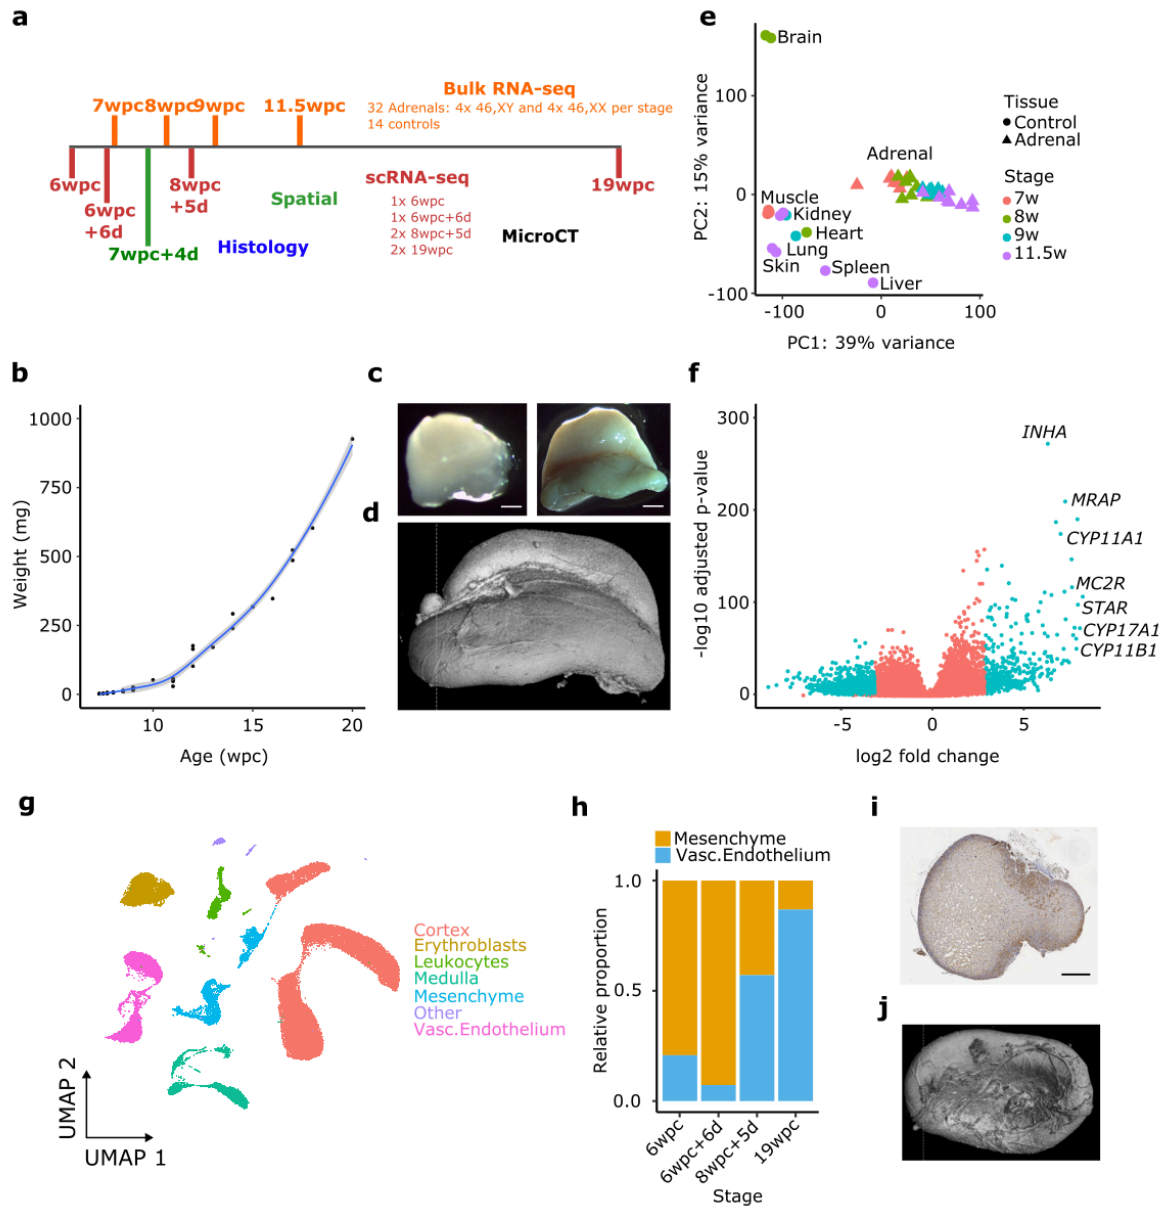

**Fig. 1. Study design, adrenal development and transcriptome analysis.** **a** Overview of the study design for generating bulk transcriptomes (bulk RNA-seq), single-cell mRNA transcriptomes (scRNA-seq), spatial transcriptomics, microCT (micro-focus computed tomography) and histology/immunohistochemistry. Stages are shown as weeks (w) and days (d) post-conception (pc). **b** Growth curve of the adrenal gland between 7 weeks post-

conception and 2 days (7wpc+2d) and 20wpc ( $n = 36$ ). Data for single glands are shown. **c** Photographs of adrenal glands (10% formalin) at 6wpc+6d (left, scale bar 300 $\mu$ m) and 16 wpc (right, scale bar 3mm) to show marked growth and anatomical changes. **d** MicroCT surface image of the adrenal gland at 17wpc showing the anterior sulcus and vasculature. **e** Principal component analysis (PCA) of bulk transcriptome data for adrenal glands at 7wpc ( $n = 8$ ), 8wpc ( $n = 8$ ), 9wpc ( $n = 8$ ) and 11.5wpc ( $n = 8$ ), and control tissues ( $n = 14$ , from 8 different tissues) as indicated. **f** Volcano plot showing differential gene expression of genes in the bulk transcriptome adrenal gland dataset (total  $n = 32$ ) compared to controls ( $n = 14$ ). Selected highly differentially expressed adrenal genes are indicated. **g** UMAP of scRNA-seq transcriptome data from four adrenal glands (6w, 6wpc+6d, 8wpc+5d, 19w) with the major different cell populations annotated (6wpc,  $n = 3047$  cells; 6wpc+6d,  $n = 2650$  cells; 8wpc+5d,  $n = 23313$  cells; 19wpc,  $n = 15348$  cells). **h** Relative proportion of mesenchyme and vascular endothelial cells in the adrenal gland at each time point studied. **i** Section of the adrenal gland at 8.5wpc stained for vascular endothelial growth factor receptor 1 (VEGFR1) expression. Scale 400 $\mu$ m. **j** MicroCT (17wpc) to show the extensive surface vascular network on the inferior surface of the gland.

**Fig. 2**

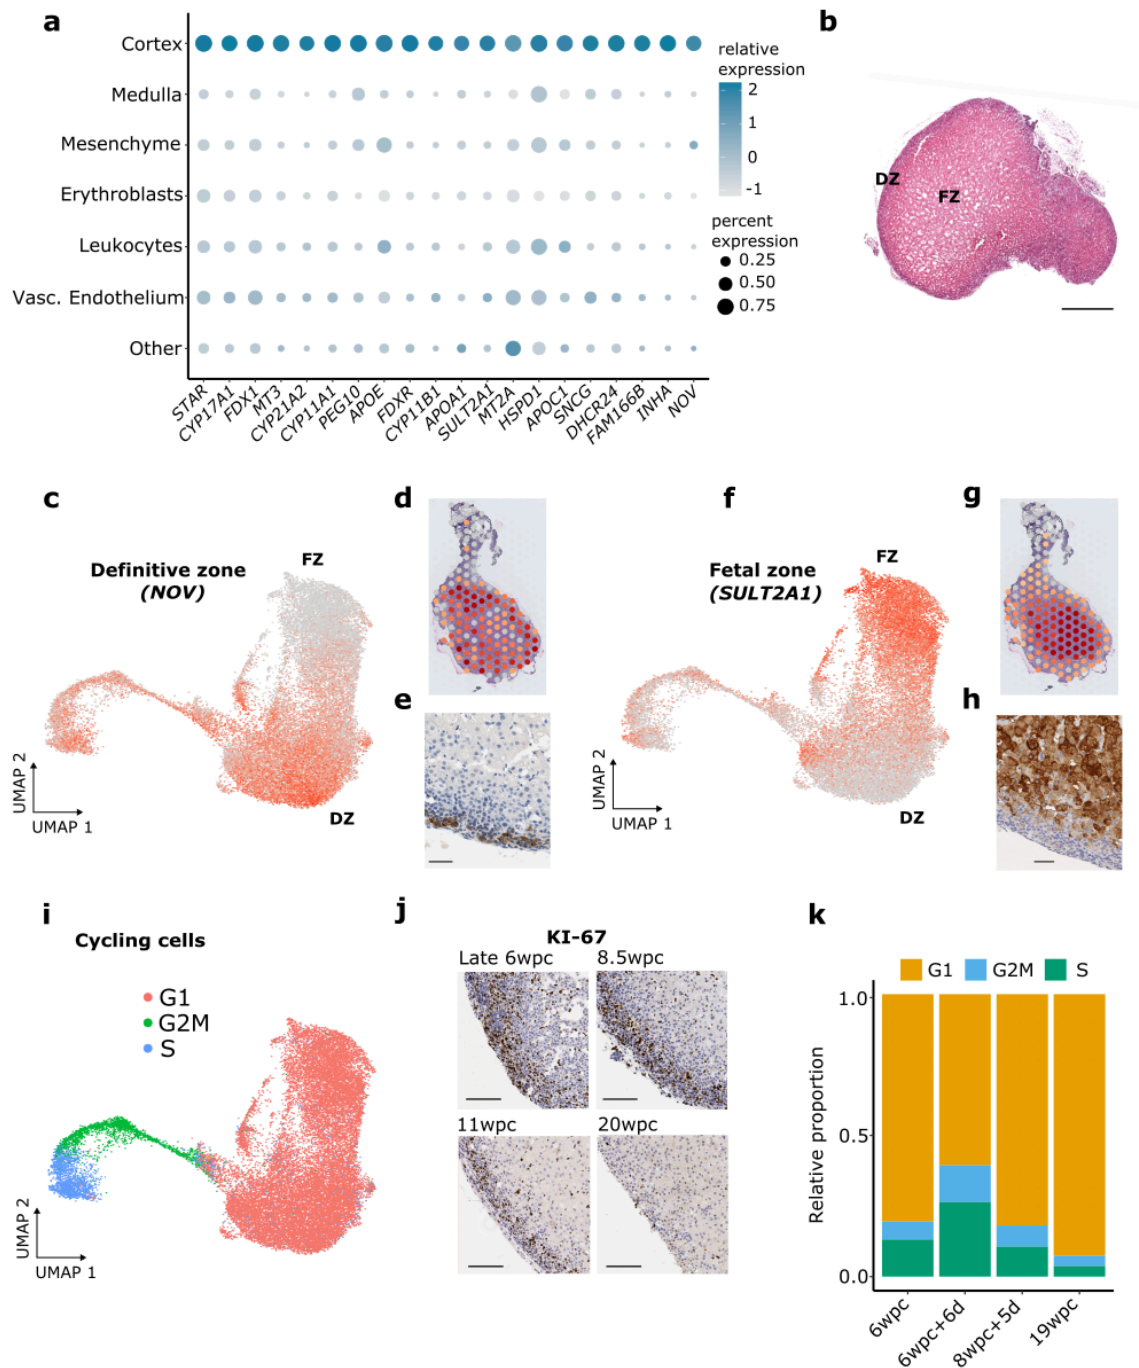

**Fig. 2. Adrenal cortex zonation and proliferation.** **a** Dot plot to show the most highly differentially-expressed genes in the adrenal cortex single cell transcriptome (scRNA-seq) compared to other cells in the adrenal gland. **b** Histology of the human fetal adrenal gland at 8.5wpc (H&E staining). DZ, definitive zone; FZ, fetal zone. Scale 400 $\mu$ m. **c-e** The



developing definitive zone shown by *NOV* (also known as *CCN3*) expression using a single cell mRNA transcriptome UMAP (**c**), spatial transcriptomic spotplot (7wpc+4d, darker red shows higher expression) (**d**) and immunohistochemistry (11wpc; scale 50 $\mu$ m) (**e**).

Integrated data from samples at all four time points are shown. **f-h** The developing fetal zone shown by *SULT2A1* expression using a single cell mRNA transcriptome UMAP (**f**), spatial transcriptomic spotplot (7wpc+4d) (**g**) and immunohistochemistry (11wpc; scale 50 $\mu$ m) (**h**). **i** Integrated UMAP showing cell cycle states. **j** Immunohistochemistry of fetal adrenal gland showing KI67 expression as a marker of cell proliferation at different ages. Scales all 100 $\mu$ m. **k** Relative proportion of cells in each cell cycle state at each time point.

**Fig. 3**

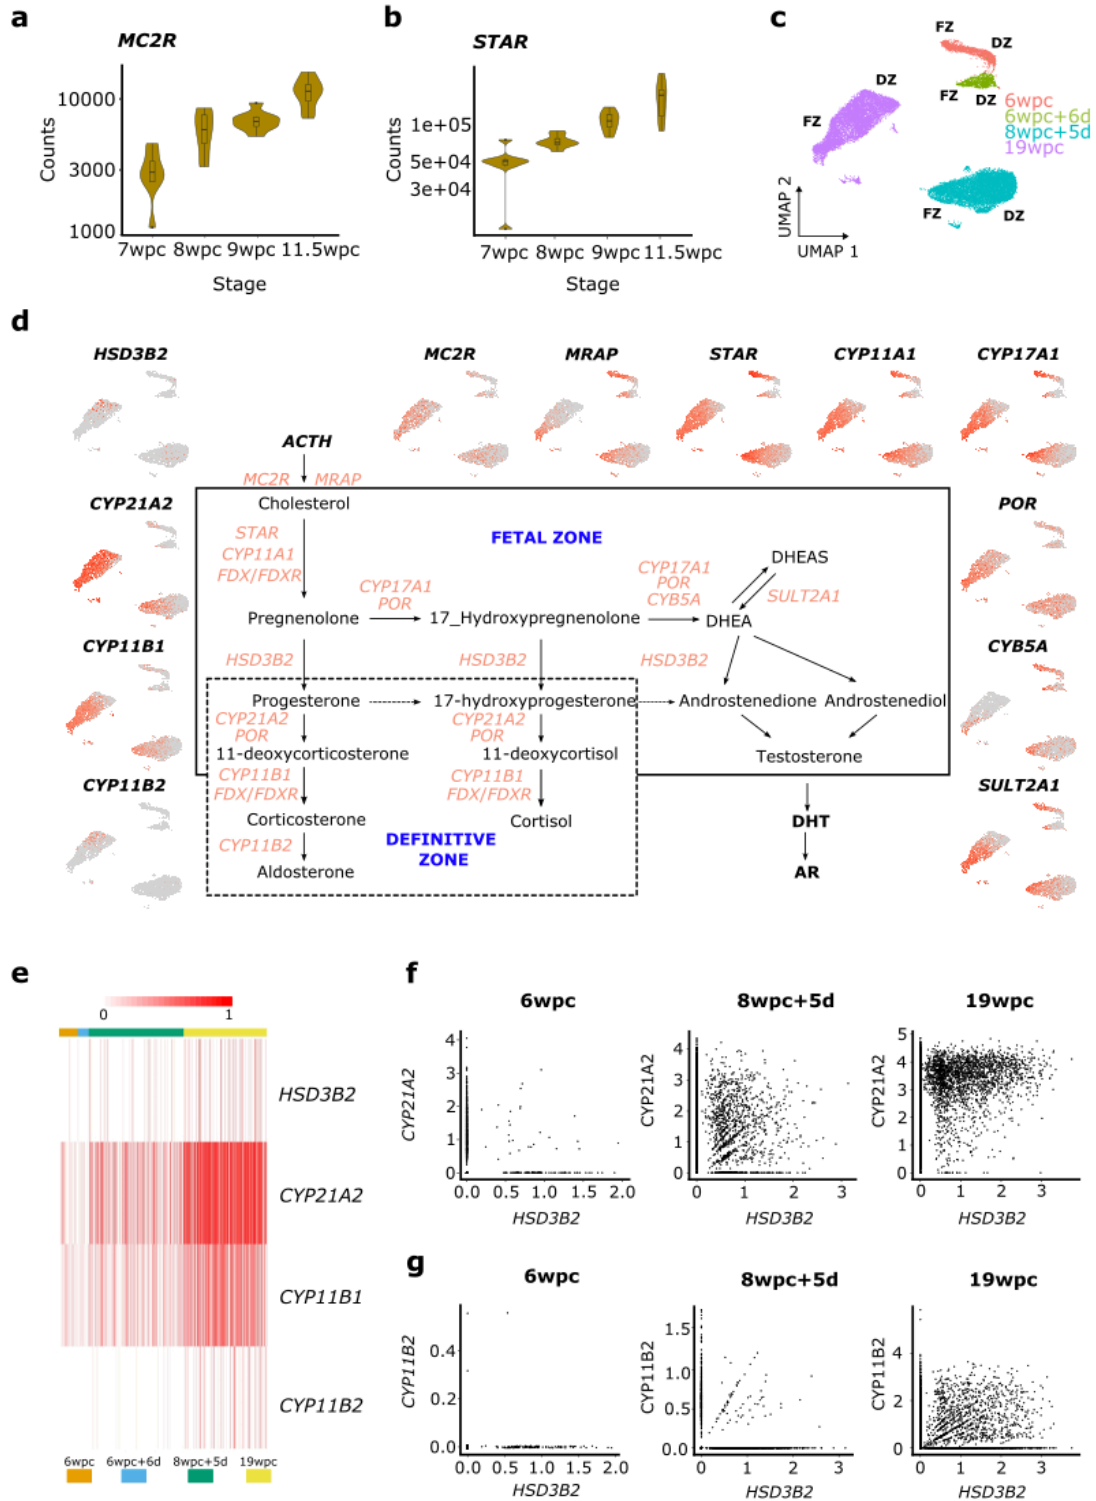

**Fig. 3. Expression of classic steroidogenic pathway genes during human adrenal**

**development.** **a** Time-series bulk RNA-seq expression (normalized counts) of the melanocortin-2 receptor gene (*MC2R*), encoding the adrenocorticotropin (ACTH) receptor. **b** Time-series bulk RNA-seq expression of the gene encoding steroidogenic acute regulatory protein (*STAR*). **c** UMAP of adrenal cortex clusters used for subsequent analysis. DZ, definitive zone; FZ, fetal zone. **d** Graphical representation of the “classic” steroidogenic pathway showing the key genetic components leading to the synthesis of mineralocorticoids (e.g. aldosterone), glucocorticoids (e.g. cortisol) and androgens (e.g. dehydroepiandrosterone (DHEA), androstenedione, testosterone). Feature plots showing the expression of key genes in the adrenal cortex clusters at different time points are shown. ACTH, adrenocorticotropin; AR, androgen receptor; *CYP5A*, cytochrome 5A; *CYP11A1*, P450 side-chain cleavage enzyme; *CYP11B1*, 11 $\beta$ -hydroxylase; *CYP11B2*, aldosterone synthase; *CYP17A1*, 17 $\alpha$ -hydroxylase/17,20-lyase; *CYP21A2*, 21-hydroxylase; DHEA(S), dehydroepiandrosterone (sulfate); DHT, dihydrotestosterone; *HSD3B2*, 3 $\beta$ -hydroxysteroid dehydrogenase type 2; *MC2R*, melanocortin-2 receptor (ACTHR); *MRAP*, *MC2R*-accessory protein; *POR*, P450 oxidoreductase; *STAR*, steroidogenic acute regulatory protein; *SULT2A1*, sulfotransferase 2 A1. **e** Heatmap of scRNA-seq expression of *HSD3B2*, *CYP21A2*, *CYP11B1* and *CYP11B2* at different ages in the adrenal cortex clusters. **f** Scatter plots of expression of *HSD3B2* in individual cortex single cells (scRNA-seq) compared to *CYP21A2* at three different time points (6wpc, 8wpc+5d, 19wpc). **g** Scatter plots of expression of *HSD3B2* in individual cortex single cells (scRNA-seq) compared to *CYP11B2* at three different time points (6wpc, 8wpc+5d, 19wpc).

**Fig. 4**

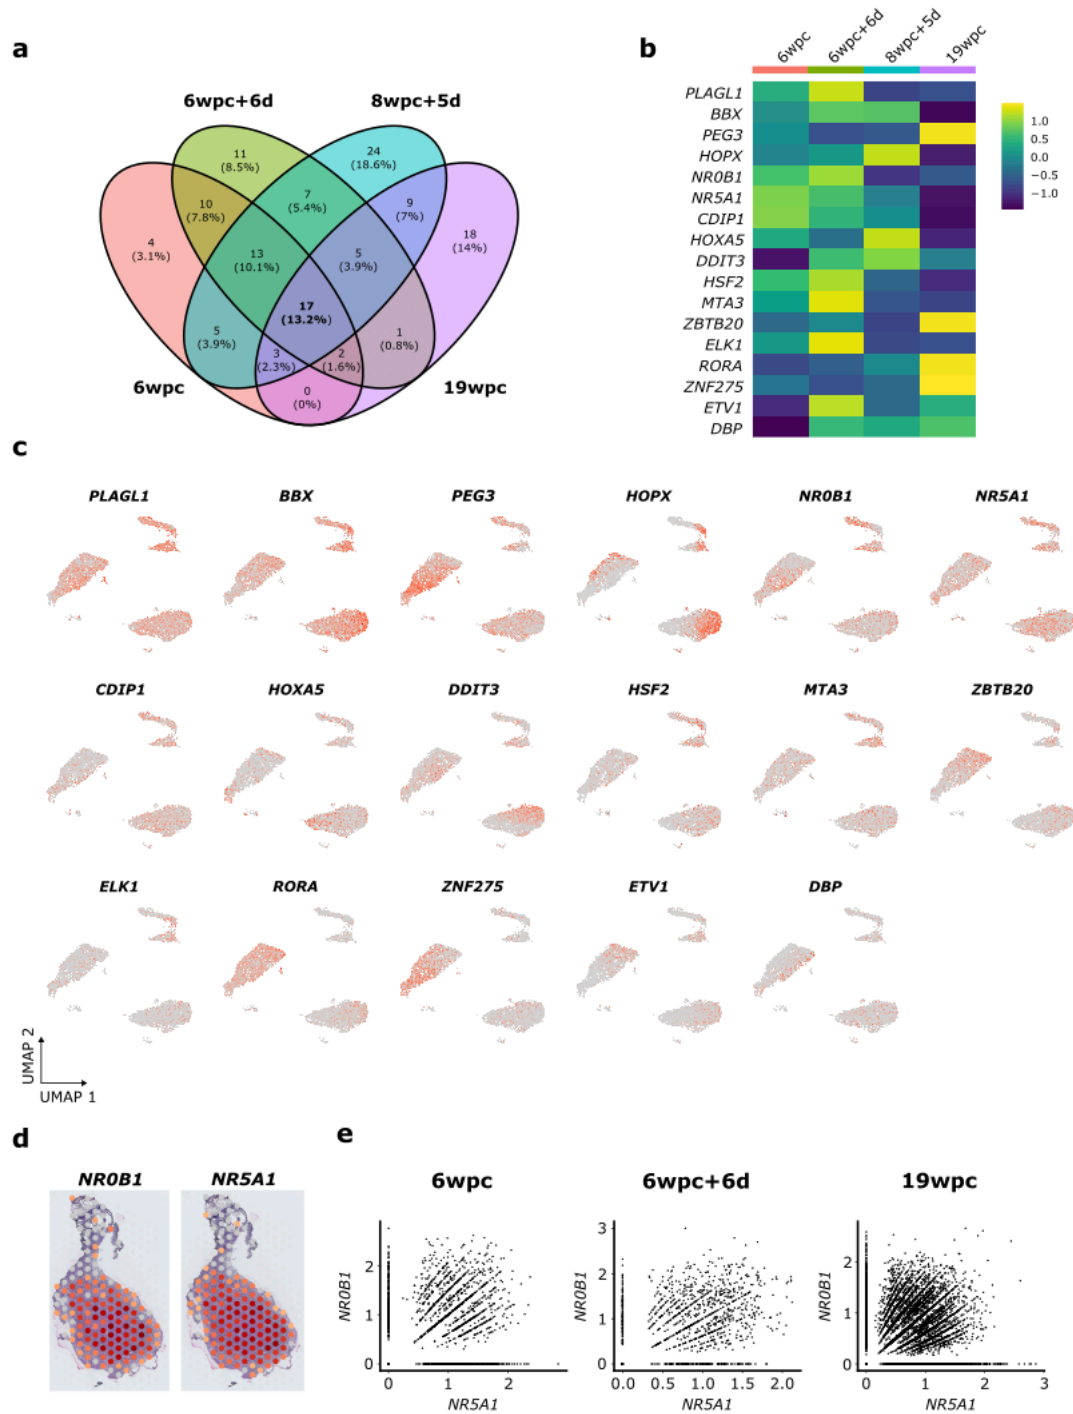

**Fig. 4. Expression of transcription factors during human adrenal cortex development. a** Venn diagram showing the overlap of differentially-expressed transcription factors in the scRNA-seq dataset at each age. Differential expression was defined as being enriched in the

adrenal cortex cluster compared to all other clusters in the whole adrenal sample at each age ( $\log_2FC > 0.25$ ,  $p_{adj} < 0.05$ ). A core group of 17 transcription factors common to all ages was identified. **b** Heatmap showing relative expression of these 17 transcription factors at each age in the scRNA-seq dataset. **c** Feature plots showing expression of these 17 transcription factors in adrenal cortex clusters (for annotation, see Fig. 3c). **d** Spatial transcriptomic spotplot expression of the key nuclear receptors, *NROB1* (also known as DAX-1) and *NR5A1* (also known as steroidogenic factor-1, SF-1) at 7wpc+4d. **e** Scatter plots of expression of *NR5A1* in individual adrenal cortex single cells (scRNA-seq) compared to *NROB1* (6wpc, 6wpc+5d, 19wpc).

**Fig. 5**

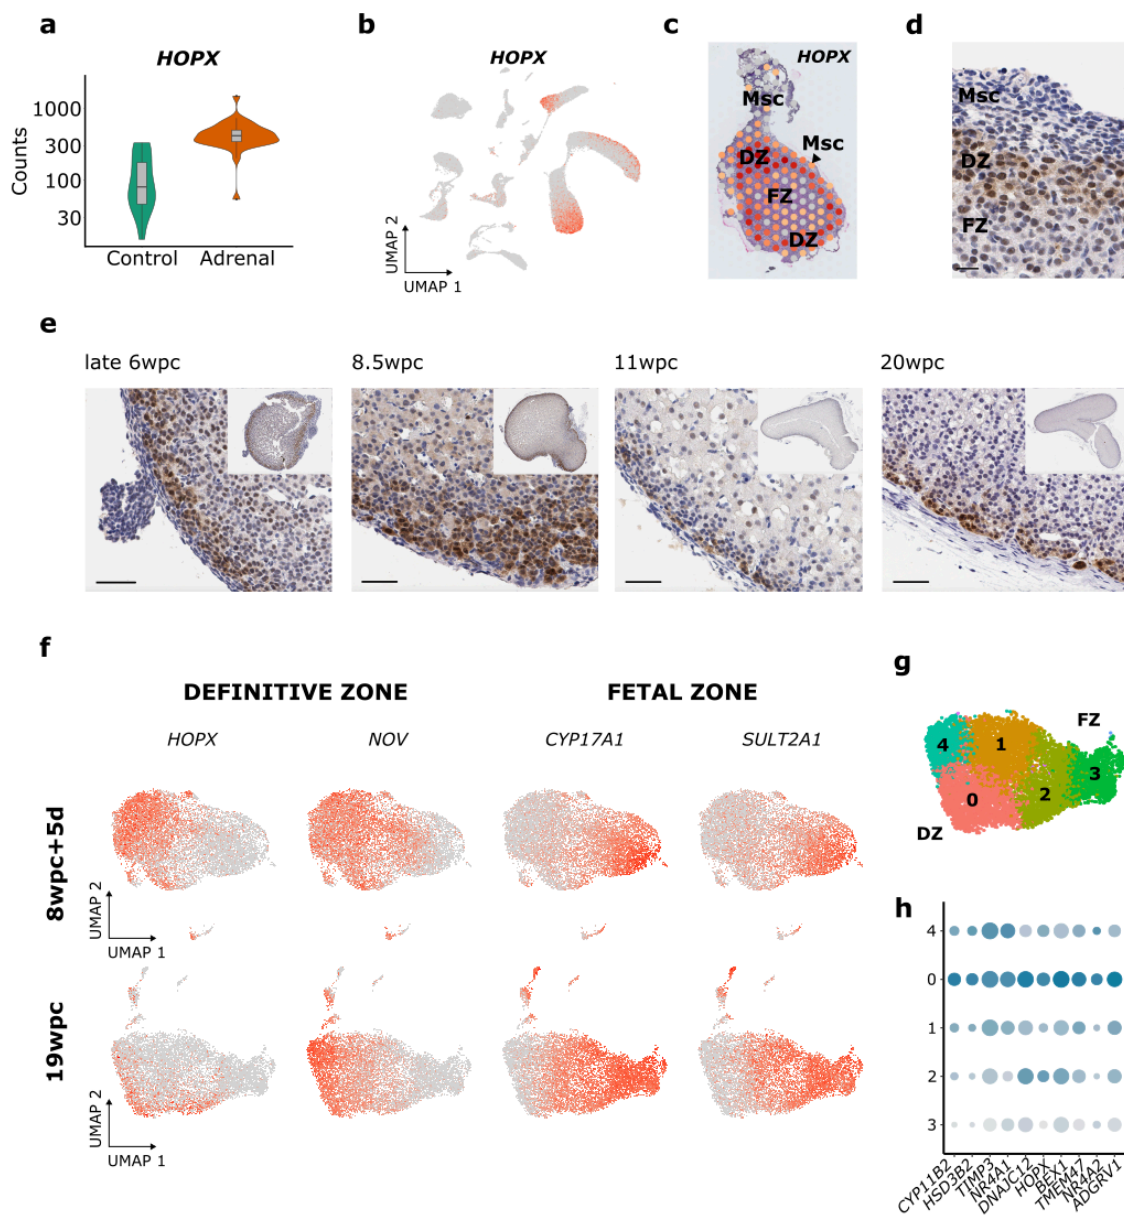

**Fig. 5. HOPX is a novel definitive zone factor.** **a** *HOPX* expression (normalized counts) in the human developing adrenal gland (combined adrenal gland samples, bulk RNA-seq) compared to controls. **b** Feature plot of *HOPX* expression in the adrenal cortex clusters (for annotation, see Fig. 1g). **c** Spatial transcriptomic spotplot showing definitive zone (DZ) expression of *HOPX* at 7wpc+4d. FZ, fetal zone; Msc, mesenchyme. **d** Immunohistochemistry showing expression of *HOPX* in the DZ at late 6wpc between the layer of outer mesenchyme (Msc) and inner adrenal fetal zone (FZ) (scale 20 $\mu$ m). **e** Immunohistochemistry showing

representative DZ expression of HOPX at each stage, with the whole adrenal gland inset. Scales all 50 $\mu$ m. **f** Feature plots of *HOPX* expression in the adrenal cortex cluster at two different ages (8wpc+5d, 19wpc) compared to the DZ marker *NOV*, and FZ markers *CYP17A1* and *SULT2A1*. **g** UMAP of key cortex clusters at 19wpc. **h** Dot-plot of the top differentially-expressed genes in cluster 0 compared to other clusters at 19wpc.

Fig. 6

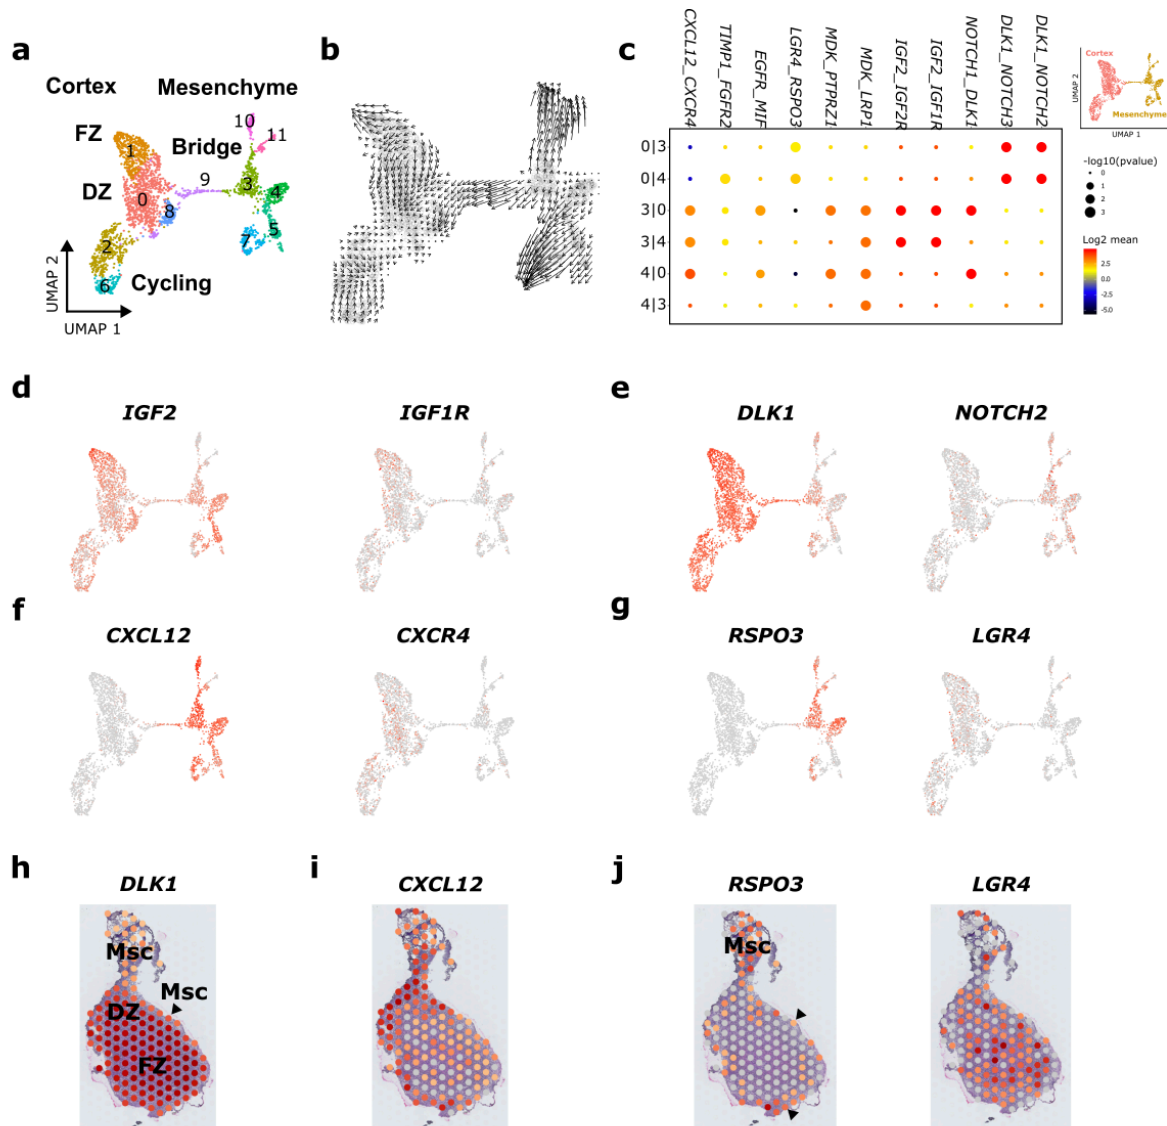

**Fig. 6. Potential bidirectional signaling interactions between the mesenchyme cluster and adrenal cortex.** Data (scRNA-seq) shown at 6wpc+6d. **a** UMAP of the mesenchyme and adrenal cortex clusters demonstrating the potential “bridge” between the two populations of cells. Subclusters used for cell-cell communication analysis are shown. DZ, definitive zone; FZ, fetal zone. **b** Single-cell velocity estimates overlaid on the UMAP projection of mesenchyme-adrenal cortex clusters (RNA Velocity). **c** Potential ligand-receptor interactions for key subclusters in the mesenchyme (3, 4) and adrenal cortex (0), using CellPhoneDB. **d** Feature plot showing expression of *IGF2* (encoding ligand) and expression of *IGF1R*



(encoding cognate receptor). **e** Feature plot showing expression of *DLK1* (encoding ligand) and expression of *Notch 2* (encoding receptor) (see also Supplementary Figure XX). **f** Feature plot showing expression of *CXCL12* (encoding ligand) and expression of *CXCR4* (encoding receptor). **g** Feature plot showing expression of *RSPO3* (encoding ligand) and expression of *LGR4* (encoding receptor). **h** Spatial transcriptomic spotplot (7wpc+4d) of *DLK1* in the definitive zone (DZ) and fetal zone (FZ) of the adrenal gland, with weaker expression in the mesenchyme (Msc)/subcapsular region. **i** Spatial transcriptomic spotplot (7wpc+4d) of *CXCL12*, strongest in the mesenchyme (Msc)/subcapsular region of the adrenal gland. **j** Spatial transcriptomic spotplot (7wpc+4d) of *RSPO3* in the mesenchyme (Msc, and arrowheads)/subcapsular region of the adrenal gland and *LGR4* in the adrenal cortex.

**Fig. 7**

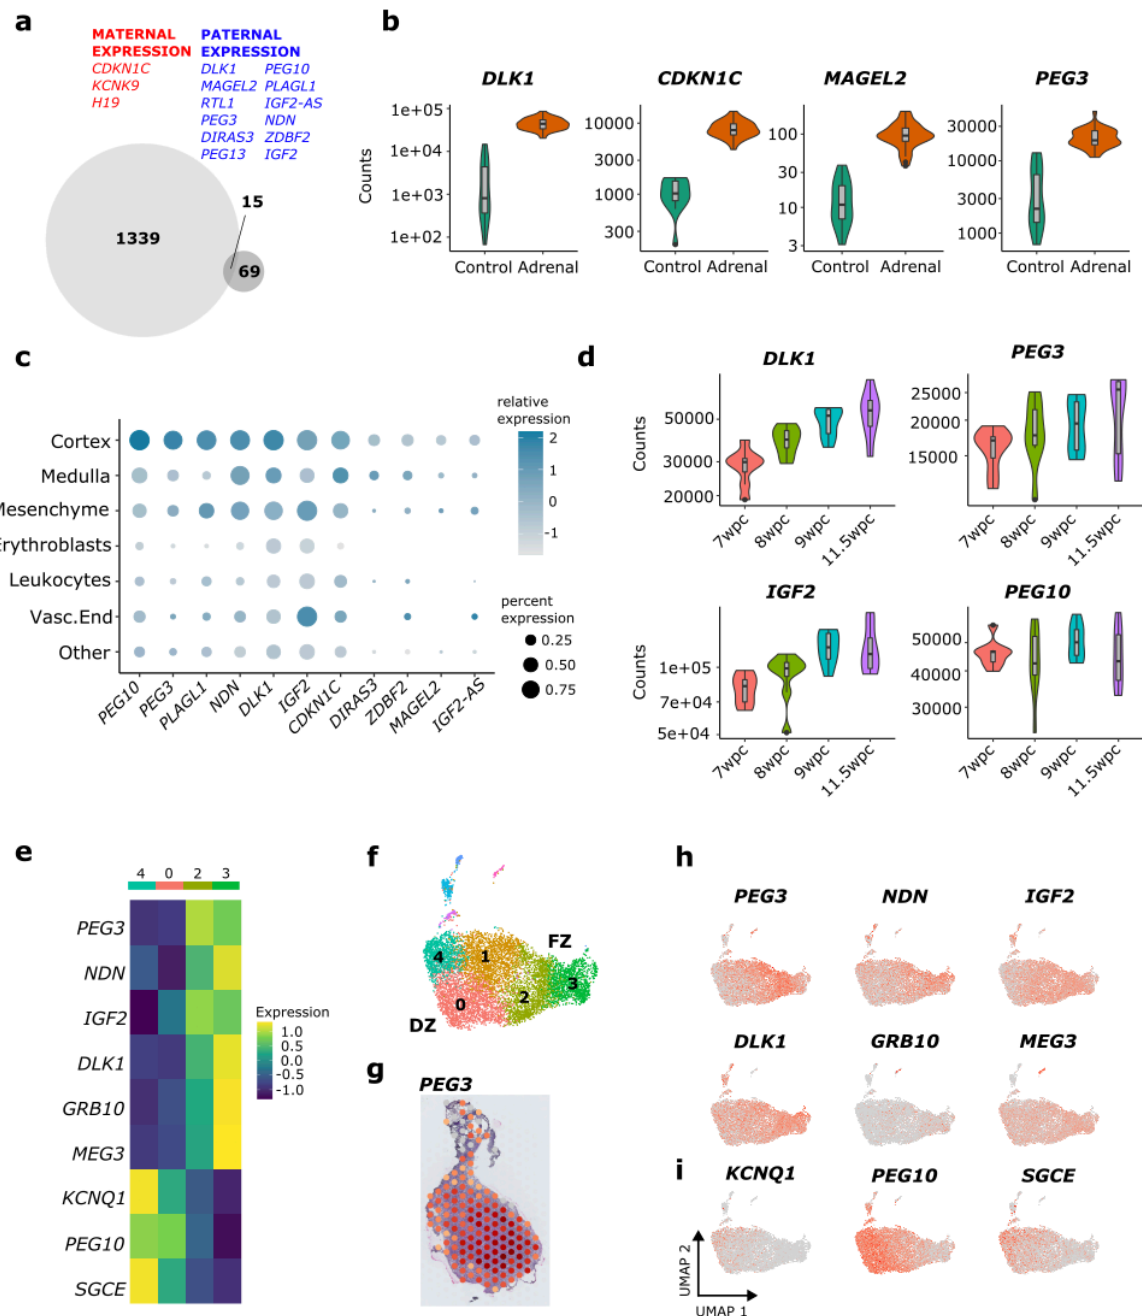

**Fig. 7. Imprinted genes in human adrenal development.** **a** Venn diagram showing the 15 imprinted genes (non-placental specific) that are differentially-expressed in the adrenal cortex cluster (bulk RNA-seq adrenal > control,  $\log_2FC > 1.5$   $padj < 0.05$ ). **b** Violin plots (normalized counts) of bulk RNA-seq expression of several key imprinted genes in the

adrenal gland compared to control tissues. **c** Dot plot of key differentially-expressed imprinted genes in different scRNA-seq clusters of the developing human adrenal gland. **d** Violin plots showing time-series bulk RNA-seq expression of key imprinted factors in the developing human adrenal gland. **e** Heatmap of the expression of key imprinted genes in different clusters of the adrenal cortex at 19wpc (see Fig. 6f). **f** UMAP of adrenal cortex subclusters at 19wpc. **g** Spatial transcriptomic spotplot (7wpc+4d) of paternally-expressed gene 3 (*PEG3*) showing strong expression, especially in the central fetal zone. **h** Feature plots of seven key paternally-expressed (maternally-imprinted) genes in the adrenal cortex (19wpc). **i** Feature plot of three key maternally-expressed (paternally-imprinted) genes in the adrenal cortex (19wpc).

**Fig. 8**

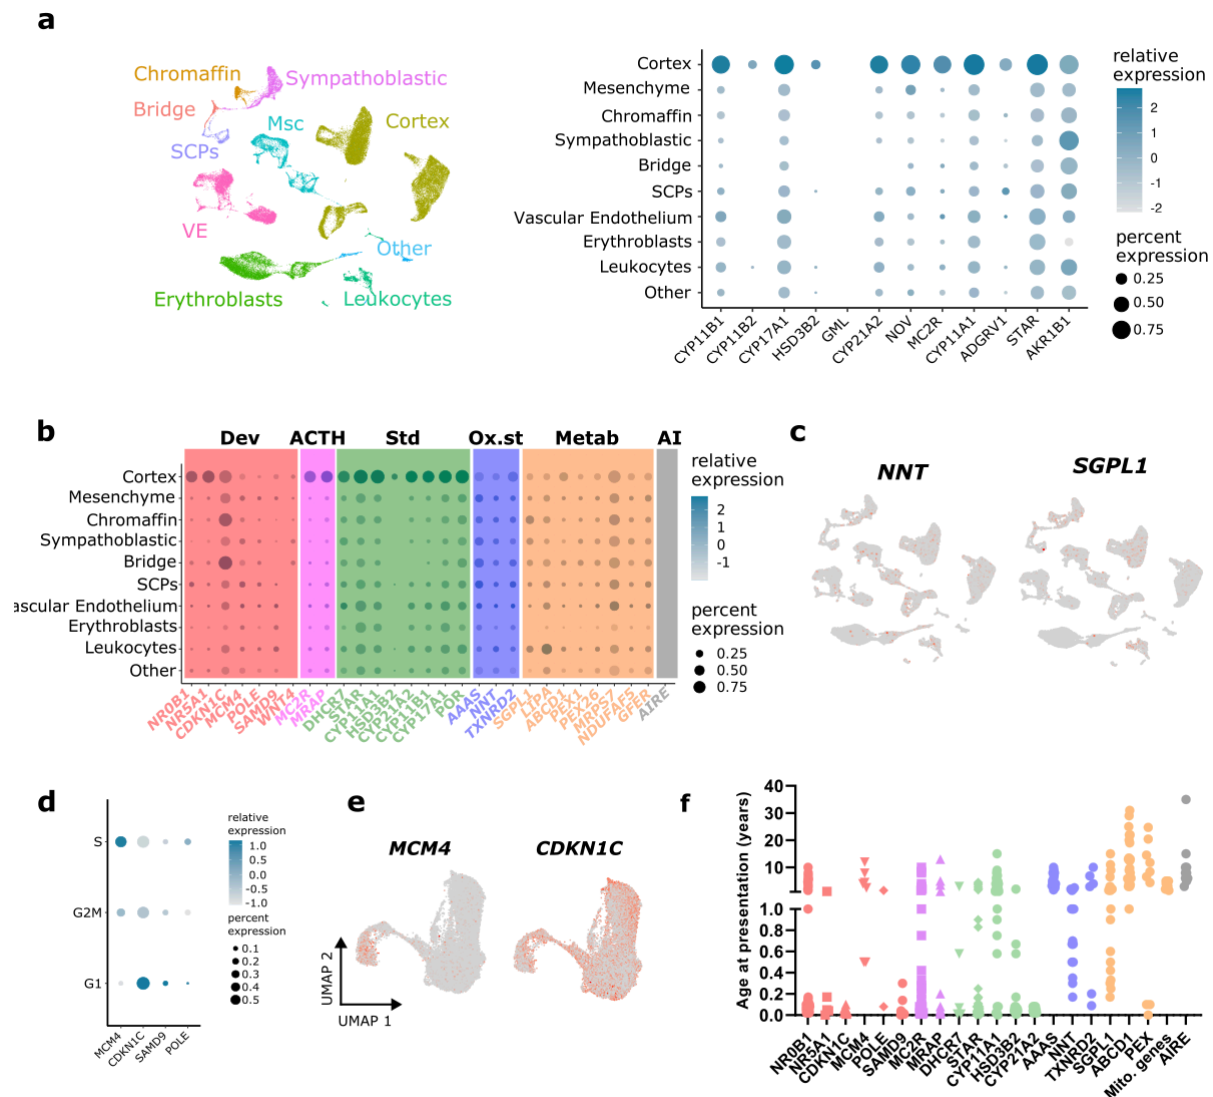

**Fig. 8. Expression of genes enriched in the adult adrenal gland and in monogenic causes of primary adrenal insufficiency.** **a** Dot plot showing fetal adrenal gland expression of genes with the highest “tissue specificity score” (enriched expression) in the adult adrenal gland, as defined in the Human Protein Atlas ([www.proteinatlas.org](http://www.proteinatlas.org)). **b** Dot plot showing the expression of genes associated with monogenic causes of primary adrenal (glucocorticoid) insufficiency (PAI) in the adrenal cortex and other adrenal clusters during development (see UMAP Fig. 8a). **c** Feature plot for expression of nicotinamide nucleotide transhydrogenase

(*NNT*) and sphingosine-1-phosphate lyase 1 (*SGPL1*). **d** Dot plot of the expression of PAI-causing genes proposed to be involved in adrenal growth and cell division in different cell cycle phases (S phase, G2M, G1). **e** Expression of mini-chromosome maintenance complex component 4 (*MCM4*) and cyclin-dependent kinase inhibitor 1C (*CDKN1C*) in the integrated adrenal cortex cluster with cycling cells included (see Fig. 2i). **f** Age at presentation with adrenal insufficiency of children and young people with selected monogenic causes of PAI.
